# 1    **The complete structure of the human TFIID core complex**

2

3    Basil J. Greber<sup>1,2</sup>, Daniel B. Toso<sup>1</sup>, Jie Fang<sup>3</sup>, Eva Nogales<sup>1,2,3,4,\*</sup>

4

5    <sup>1</sup> California Institute for Quantitative Biosciences (QB3), University of California,  
6    Berkeley, California 94720, USA

7    <sup>2</sup> Molecular Biophysics and Integrative Bio-Imaging Division, Lawrence Berkeley  
8    National Laboratory, Berkeley, California 94720, USA

9    <sup>3</sup> Howard Hughes Medical Institute, University of California, Berkeley, California  
10    94720, USA

11    <sup>4</sup> Department of Molecular and Cell Biology, University of California, Berkeley,  
12    California 94720, USA

13

14    \* **For correspondence:** Enogales@lbl.gov (E.N.)

15

16    **Competing interests:** The authors declare that no competing interests exist.

17

18

## ABSTRACT

Transcription factor IIH (TFIIH) is a heterodecameric protein complex critical for transcription initiation by RNA polymerase II and nucleotide excision DNA repair. The TFIIH core complex is sufficient for its repair functions and harbors the XPB and XPD DNA-dependent ATPase/helicase subunits, which are affected by human disease mutations. Transcription initiation additionally requires the CdK activating kinase subcomplex. Previous structural work has provided only partial insight into the architecture of TFIIH and its interactions within transcription pre-initiation complexes. Here, we present the complete structure of the human TFIIH core complex, determined by phase-plate cryo-electron microscopy at 3.7 Å resolution. The structure uncovers the molecular basis of TFIIH assembly, revealing how the recruitment of XPB by p52 depends on a pseudo-symmetric dimer of homologous domains in these two proteins. The structure also suggests a function for p62 in the regulation of XPD, and allows the mapping of previously unresolved human disease mutations.

## INTRODUCTION

Transcription factor IIH (TFIIH) is a 10-subunit protein complex with a total molecular weight of 0.5 MDa that serves a dual role as a general transcription factor for transcription initiation by eukaryotic RNA polymerase II (Pol II), and as a DNA helicase complex in nucleotide excision DNA repair (NER) (Compe & Egly, 2016; Sainsbury et al., 2015). Mutations in TFIIH subunits that cause the inherited autosomal recessive disorders xeroderma pigmentosum (XP), trichothiodystrophy (TTD), and Cockayne syndrome (CS) are characterized by high incidence of cancer or premature ageing (Cleaver et al., 1999; Rapin, 2013). Furthermore, TFIIH is a possible target for anti-cancer compounds (Berico & Coin, 2017) and therefore of great importance for human health and disease.

The TFIIH core complex is composed of the seven subunits XPB, XPD, p62, p52, p44, p34, and p8, and is the form of TFIIH active in DNA repair (Svejstrup et al., 1995), where TFIIH serves as a DNA damage verification factor (Li et al., 2015;

Mathieu et al., 2013) and is responsible for opening a repair bubble around damaged nucleotides. This activity depends on both the SF2-family DNA-dependent ATPase XPB, and the DNA helicase activity of XPD (Coin et al., 2007; Evans et al., 1997; Kuper et al., 2014). TFIIH function in transcription initiation requires the double-stranded DNA translocase activity of XPB to regulate opening of the transcription bubble (Alekseev et al., 2017; Fishburn et al., 2015; Grünberg et al., 2012), and additionally the Cdk activating kinase (CAK) complex, which harbors the kinase activity of CDK7 as well as the Cyclin H and MAT1 subunits (Devault et al., 1995; Fisher et al., 1995; Fisher & Morgan, 1994; Shiekhattar et al., 1995; Svejstrup et al., 1995). Targets of human CDK7 include the C-terminal heptapeptide repeat domain of the largest subunit of Pol II, as well as cell-cycle regulating CDKs (Fisher & Morgan, 1994; Shiekhattar et al., 1995). MAT1 serves as a bridging subunit that promotes CAK subcomplex formation by interacting with Cyclin H and CDK7 (Devault et al., 1995; Fisher et al., 1995), recruits the CAK to the core complex by interactions with XPD and XPB (Abdulrahman et al., 2013; Busso et al., 2000; Greber et al., 2017; Rossignol et al., 1997), and also aids in Pol II-PIC formation by establishing interactions with the core PIC (He et al., 2013; He et al., 2016; Schilbach et al., 2017). The presence of MAT1 inhibits the helicase activity of XPD (Abdulrahman et al., 2013; Sandroock & Egly, 2001), but the mechanism of this inhibition is not fully understood. While the enzymatic activity of XPD is not required for transcription initiation, it is critical for the DNA repair function of TFIIH (Dubaele et al., 2003; Evans et al., 1997; Kuper et al., 2014). Therefore, NER requires the release of the CAK subcomplex from the core complex (Coin et al., 2008). The activities of both XPB and XPD are regulated by interactions with additional TFIIH components, including that of p44 with XPD (Coin et al., 1998; Dubaele et al., 2003; Kim et al., 2015), and those of the p52-p8 module with XPB (Coin et al., 2007; Coin et al., 2006; Jawhari et al., 2002; Kainov et al., 2008). These interactions are likely to be crucial for TFIIH function, as some are affected by disease mutations (Cleaver et al., 1999), but they have been only partially characterized mechanistically.

Our previous structure of the TFIIH core-MAT1 complex at 4.4 Å resolution (Greber et al., 2017) allowed modeling of TFIIH in the best-resolved parts of the

density map, but several functionally important regions remained unassigned or only partially interpreted because reliable *de novo* tracing of entire domains in the absence of existing structural models was not possible. Here, we present the complete structure of the human TFIIH core complex in association with the CAK subunit MAT1, determined by phase plate cryo-electron microscopy (cryo-EM) at 3.7 Å resolution. Our structure reveals the complete architecture of the TFIIH core complex and provides detailed insight into the interactions that govern its assembly. Additionally, our cryo-EM maps define the molecular contacts that control the regulation of the XPB and XPD subunits of TFIIH, including the critical p52-XBP interaction, and an extensive regulatory network around XPD, formed by XPB, p62, p44, and MAT1.

## RESULTS

### Structure determination of TFIIH

To determine the complete structure of the human TFIIH core complex, we collected several large cryo-EM datasets (Supplementary Table 1) of TFIIH immuno-purified from HeLa cells using an electron microscope equipped with a Volta phase plate (VPP) (Danev & Baumeister, 2017) and a direct electron detector camera mounted behind an energy filter. From a homogeneous subset of approximately 140,000 TFIIH particle images identified by 3D classification (Scheres, 2010), we reconstructed a 3D cryo-EM density map at 3.7 Å resolution (Figure 1 – figure supplements 1, 2A-C). This VPP-based cryo-EM map was substantially improved compared to our previous maps obtained without phase plate, both in resolution and interpretability (Figure 1 – figure supplement 2D-G), and enabled building, refinement, and full validation of an atomic model of the TFIIH core complex and the MAT1 subunit of the CAK subcomplex (Figure 1A-C, Figure 1 – figure supplement 2B, C, Supplementary Tables 2, 3), while the remainder of the CAK is invisible in our map due to extreme motion. Tracing and sequence register assignment of protein components modeled *de novo* was facilitated by density maps obtained from focused classification and multibody refinement (Figure 1 – figure supplements 3-5) (Bai et al., 2015; Nakane et al.,





**Figure supplement 4.** Focused classification and interpretation of the MAT1

RING domain density.

**Figure supplement 5.** Multibody refinement.

**Figure supplement 6.** Detailed architecture of the TFIIH core complex.

# **Detailed architecture of TFIIH and structure of p62**

Our structure of the TFIIH core complex shows its horseshoe-like overall shape (Figure 1A-C), as observed in previous lower-resolution reconstructions of free and PIC-bound TFIIH (Gibbons et al., 2012; Greber et al., 2017; He et al., 2016; Murakami et al., 2015; Schilbach et al., 2017), and allows us to define the complete set of inter-subunit interactions that lead to the formation of the TFIIH core complex (Figure 1D).

The largest subunits of the complex, the SF2-family DNA-dependent ATPases XPB and XPD, both containing two RecA-like domains (RecA1 and RecA2), interact directly (Greber et al., 2017) and are on one side of the complex, and are additionally bridged by MAT1 (Figure 1B), which has been shown to interact with either ATPase in isolation (Busso et al., 2000). On the side facing away from MAT1, XPD interacts with the von Willebrand Factor A (vWFA) domain of p44 (Coin et al., 1998; Dubaele et al., 2003; He et al., 2016; Kim et al., 2015), which in turn forms a tight interaction with p34 via interlocking eZnF domains (Schilbach et al., 2017) and a p44 RING domain interaction (Radu et al., 2017) (Figure 1B-D, Figure 1 – figure supplement 6J, K), consistent with the formation of a multivalent interaction network between p34 and p44 (Radu et al., 2017). The vWFA domain of p34 recruits p52 by a three-way interaction that involves the most N-terminal winged helix domain in p52 and a helical segment of p62 (Schilbach et al., 2017) (Figure 1 – figure supplement 6L). The p52 C-terminal region comprises two domains; first, the ‘clutch’ that interacts with XPB (Jawhari et al., 2002) and second, a dimerization module that binds p8 (Kainov et al., 2008), thereby recruiting XPB to TFIIH and cradling XPB RecA2 (see below). In addition to this structural framework that is formed by folded domains, our cryo-EM map reveals several interactions involving extended protein segments,

including several interactions formed by p62 (Figure 2), and an interaction between the p44 N-terminal extension (NTE) and the N-terminal domain (NTD) of XPB (Figure 1B). To form this interaction, approx. 15 residues of p44 span the distance between the p44 vWFA domain and the XPB NTD, where a small helical motif in p44 contacts XPB residues 72-75, 95-102, and 139-143, in agreement with CX-MS data (Luo et al., 2015) (Figure 1 – figure supplement 6E). Partial deletion of the p44 NTE in yeast causes a slow-growth phenotype, suggesting a functional role for this p44-XPB interaction (Warfield et al., 2016).

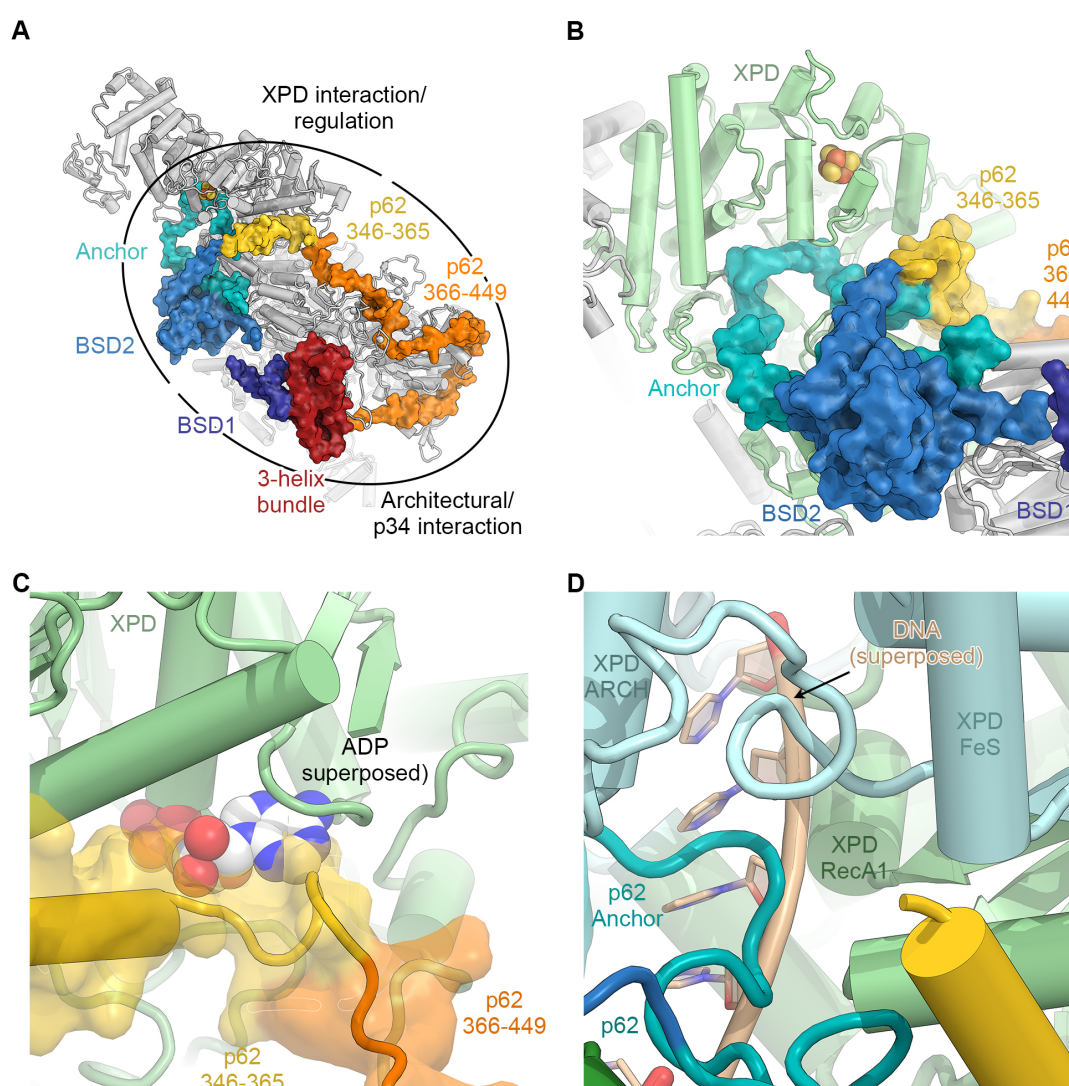

**Figure 2. The structure of p62.** (A) View of the top surface of the TFIIH core complex; p62 is color-coded by structural region. (B) The BSD2 (blue) and XPD anchor segments (teal) of p62 (surface) interact with the region around the XPD substrate-binding cavity. (C) Residues 346-365 of p62 (yellow) approach the

nucleotide-binding pocket of XPD. ADP superposed from the structure of the DinG helicase (Cheng & Wigley, 2018). (D) Superposition of DNA from the structure of the substrate-bound DinG helicase (Cheng & Wigley, 2018) shows that the positions of p62 and RecA1-bound DNA overlap.

**Figure supplement 1.** Analysis of the structure of p62.

The p62 subunit is almost completely resolved in our structure and exhibits a complex beads-on-a-string-like topology. It fully encircles the top surface of TFIIH (Figures 1C, 2A, Figure 2 – figure supplement 1), interacting with XPD, p52, p44, and p34, in agreement with previous structural findings (Greber et al., 2017; Schilbach et al., 2017). Based on these interactions, p62 can be subdivided into three functional regions: (i) the N-terminal PH-domain, disordered in our structure, is responsible for mediating interactions with components of the core transcriptional machinery (Di Lello et al., 2008; He et al., 2016; Schilbach et al., 2017), transcriptional regulators (Di Lello et al., 2006), and DNA repair pathways (Gervais et al., 2004; Lafrance-Vanasse et al., 2013; Okuda et al., 2017); (ii) residues 108-148 and 454-548 of p62, including the first BSD (BTF2-like, synapse-associated, DOS2-like) domain (BSD1) and the C-terminal 3-helix bundle, play an architectural role by binding to p34 and the extended zinc finger (eZnF) domain of p44 (Figure 2A, C, Figure 1 – figure supplement 6J-L, Figure 2 – figure supplement 1B, C); and (iii) residues 160-365, including the BSD2 domain, are responsible for interactions with and regulation of XPD (Figure 2B-D, Figure 2 – figure supplement 1D-F).

Specifically, p62 residues 160-365 form three structural elements that interact with XPD (Figure 2B), in agreement with previous biochemical, structural, and CX-MS data (Figure 1 – figure supplement 6G) (Jawhari et al., 2004; Luo et al., 2015; Schilbach et al., 2017). First, an  $\alpha$ -helix formed by p62 residues 295-318 binds directly to XPD RecA2 and thereby recruits residues 160-258 of p62, comprising the BSD2 domain and adjacent sequence elements, to this surface of XPD RecA2 (Figures 2A, B, Figure 2 – figure supplement 1D). Second, p62 residues 266-287 are inserted into the DNA-binding cavity of XPD (Figures 2B,



D), in agreement with previous observations (Schilbach et al., 2017). This inserted p62 segment directly blocks a DNA-binding site on XPD RecA1 (Figure 2D) and localizes near the access path to a pore-like structure between the XPD FeS and ARCH domains. While p62 does not directly contact the DNA-binding surface on XPD RecA2, it may still sterically interfere with DNA binding to the helicase elements of XPD in this region (Figure 2 – figure supplement 1E). Therefore, this segment of p62 may need to move away when XPD binds and unwinds DNA. Third, p62 residues 350-358 form a short  $\alpha$ -helix that binds in a cleft between the two RecA-like domains of XPD (Figure 2C), so that it not only closes the entrance to the nucleotide binding pocket in XPD RecA1 (Figure 2 – figure supplement 1F), but also partially overlaps with the predicted location of the nucleotide itself (Figure 2C), strongly suggesting a role for this p62 sequence element in XPD regulation. The density for these structural elements of p62 (residues 260-300 and 346-365) in our cryo-EM map is weaker than for the remainder of the complex, suggesting a dynamic interaction with XPD that enables them to modulate the access to the nucleotide-binding pocket, the DNA-binding cavity, and the DNA-translocating pore of XPD, depending on the functional state of TFIIH. 3D reconstructions of TFIIH classified for these regions of p62 (Figure 1 – figure supplement 3) show globally intact TFIIH, both in the presence and absence of the p62 segments at these XPD sites (Figure 2 – figure supplement 1G-J), supporting our hypothesis of dynamic regulation, rather than the alternative hypothesis of p62 binding to XPD as a requirement for TFIIH stability (Luo et al., 2015).

## **Molecular basis of XPB recruitment by p52**

Our structure of TFIIH resolves the structure and interactions of all four folded domains of human XPB – two RecA-like domains that form the SF2-family type helicase cassette, a DNA damage recognition domain (DRD)-like domain, and an N-terminal domain (NTD) (Figure 3A, Figure 3 – figure supplement 1) – and reveals the molecular basis of XPB recruitment by p52. The XPB NTD encompasses residues 1-165, with the first 55 residues forming an N-terminal extension (NTE), and the remainder assuming a mixed  $\alpha/\beta$ -fold with four  $\alpha$ -

helices and five  $\beta$ -strands (Figure 3A). The side chain densities in the cryo-EM map (Figure 1 – figure supplement 6A) and CX-MS data (Luo et al., 2015) (Figure 1 – figure supplement 6F) both confirm our assignment of this domain. Existing biochemical data show that the XPB NTD is required for integration of XPB into TFIIH (Jawhari et al., 2002) by forming an interaction with p52 that has been referred to as the ‘clutch’ (Schilbach et al., 2017). In our structure, the p52 contribution to the clutch encompasses p52 residues 306-399, which, strikingly, assume the same overall fold as the XPD NTD (Figure 3B), as hypothesized previously (He et al., 2016; Luo et al., 2015), thereby forming a pseudo-symmetric dimer of structurally homologous domains. The two domains interact through their  $\beta$ -sheets, via both hydrophobic and charged interactions (Figure 3 – figure supplement 2A-C), and with the most N-terminal  $\beta$ -strand emanating from the XPB NTD extending the p52  $\beta$ -sheet by additional lateral interactions (Figure 3A, C).

Our structural findings rationalize biochemical data that show that deletion of XPB residues 1-207, but not deletion of residues 1-44, impairs the p52-XPB interaction (Jawhari et al., 2002) (Figure 3C). Our structure is also consistent with data indicating that p52 residues 304-381 are critical for the XPB-p52 interaction (Coin et al., 2007; Jawhari et al., 2002), but does not show any contacts that could explain that reported binding of XPB to p52 residues 1-135 or 1-304 (Jawhari et al., 2002) (Figure 3 – figure supplement 2D, E). The interaction between p52 and XPB not only recruits XPB to TFIIH, but also stimulates its ATPase activity *in vitro* (Coin et al., 2007). Because our structure does not shown any elements of p52 approaching the XPB nucleotide-binding pocket, we propose that this effect is likely induced by the interactions of p52 with the XPB NTD and RecA2, which may, together with p8 (Coin et al., 2006), properly arrange the XPB helicase cassette to bind and hydrolyze ATP (Figure 3D) (Grünberg et al., 2012).

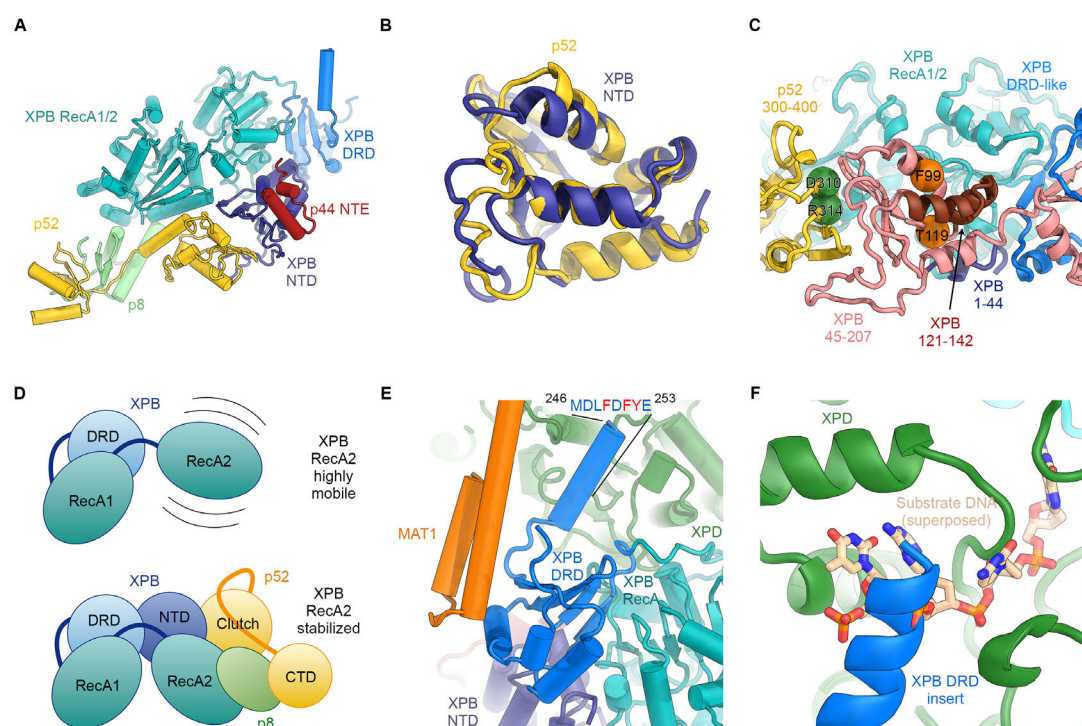

**Figure 3. Structure and interactions of XPB.** (A) Bottom lobe of TFIIH. XPB RecA1/2 teal, DRD blue, NTD dark blue, p52 yellow, p8 green, p44 NTE red. (B) Superposition of the XPB NTD and the p52 clutch domain. (C) Mapping of mutations on the XPB NTD and the p52 clutch domain; mutated regions are color-coded or shown as spheres (see text for details). (D) The combined interactions of the p52 clutch, the p8-p52 CTD dimer, and the XPB NTD with XPB RecA2 may restrict the conformational flexibility of XPB RecA2 to optimize XPB activity. (E) An extension of the DRD (blue) contacts XPD (green). The sequence for which formation of an  $\alpha$ -helix is predicted (Kelley et al., 2015) is indicated. (F) The DRD extension overlaps with the substrate-binding site on XPD RecA2. Substrate DNA modeled from PDB ID 5HW8 (Constantinescu-Aruxandei et al., 2016).

**Figure supplement 1.** Domain organization of XPB and sequence alignment of the N-terminal regions of XPB and XPB-like enzymes from eukaryotes, archaea, and bacteria.

**Figure supplement 2.** Structure and interactions of the XPB DRD and NTD.

The XPB NTD is the site of the two human disease mutations F99S and T119P, which cause XP and TTD, respectively (Cleaver et al., 1999). Or structure shows that neither of these residues is in direct contact with p52 or the RecA-like domains of XPB, suggesting that the F99S and T119P mutations exert their detrimental effects through structural perturbation of the XPB NTD (Figure 3 – figure supplements 1B, 2F-I). Specifically, T119 is located near a turn at the end of a  $\beta$ -strand (Figure 3 – figure supplement 2G), where its side chain points towards the solvent. Nevertheless, this residue is highly conserved in eukaryotic XPB from ciliates to humans, in some archaeal and bacterial XPB homologs (Figure 3 – figure supplement 1B), and in the structurally homologous clutch domain in p52 (Figure 3 – figure supplement 2F-H). This conservation suggests that a threonine at this position is important for the efficient folding of this domain in general, and that the T119P mutation may cause its destabilization, resulting in lower levels of active enzyme in TTD patients. Lower overall levels of properly assembled TFIIH have been shown to be a hallmark of TTD (Botta et al., 2002; Dubaele et al., 2003; Giglia-Mari et al., 2004) and could explain the disease-causing effect of T119P *in vivo* even though recombinant TFIIH carrying this mutation retains some activity in both transcription initiation and NER (Coin et al., 2007). A less likely alternative, given the conservation of the equivalent residue in the p52 clutch, is that T119 is involved in an interaction with a factor that is critical for cellular function, e.g. in NER.

The F99S mutation affects a residue that is conserved throughout eukaryotic XPB (Figure 3 – figure supplement 1B), is inserted into a conserved hydrophobic pocket, and localizes to an  $\alpha$ -helix at the XPB contact site with the p44 N-terminal extension (Figure 3 – figure supplement 2I). This mutation is likely to impair the stability and folding of the XPB NTD. Unlike T119P, this mutation leads to impaired DNA opening in NER assays, reduced interaction with p52, reduced ATPase activity (Coin et al., 2007), and strong impairment in DNA damage repair (Riou et al., 1999), suggesting a severe effect on the structure of the XPB NTD.

Natural and synthetic mutations in the *Drosophila melanogaster* homolog of p52 that lead to disease-like phenotypes in flies and have similar defects when



introduced into human cells (Fregoso et al., 2007) map directly to the p52-XPB interface, explaining their detrimental phenotypes (Figure 3C, Figure 3 – figure supplement 2A).

Our structure assigns XPB residues 165-300 to a DRD-like domain that connects the NTD to the RecA-like domain (Figure 3A, Figure 3 – figure supplement 1A), the deletion of which is lethal in yeast (Warfield et al., 2016). The DRD is a DNA-binding domain found in DNA repair enzymes and chromatin remodelers (Mason et al., 2014; Obmolova et al., 2000) and has been implicated in DNA damage recognition in archaeal XPB (Fan et al., 2006; Rouillon & White, 2010). Our 3.7 Å-resolution map of TFIIH reveals that in eukaryotic XPB, one  $\beta$ -strand of the DRD of archaeal XPB is replaced by an insertion of approximately 70 residues that exhibits relatively low sequence conservation (Figure 3E, Figure 3 – figure supplement 1B) and shifts the domain boundaries of the human XPB DRD-like domain with respect to previous sequence alignments (Fan et al., 2006; Oksenych et al., 2009). The part of this insertion resolved in our map consists of a negatively charged linker and an  $\alpha$ -helical element that contacts XPD directly (Figure 3E, F). The surface on XPD involved in this interaction has been implicated in the initial step of DNA substrate binding by XPD (Constantinescu-Aruxandei et al., 2016; Kuper et al., 2012). Density features and secondary structure prediction indicate the presence of several aromatic side chains of XPB near the interface (Figure 3E), where they might form contacts resembling those of nucleoside bases of XPD-bound DNA substrates (Figure 3F). Thus, XPB may modulate substrate binding by XPD, further reinforcing the idea that XPD activity is regulated by several other components of TFIIH.

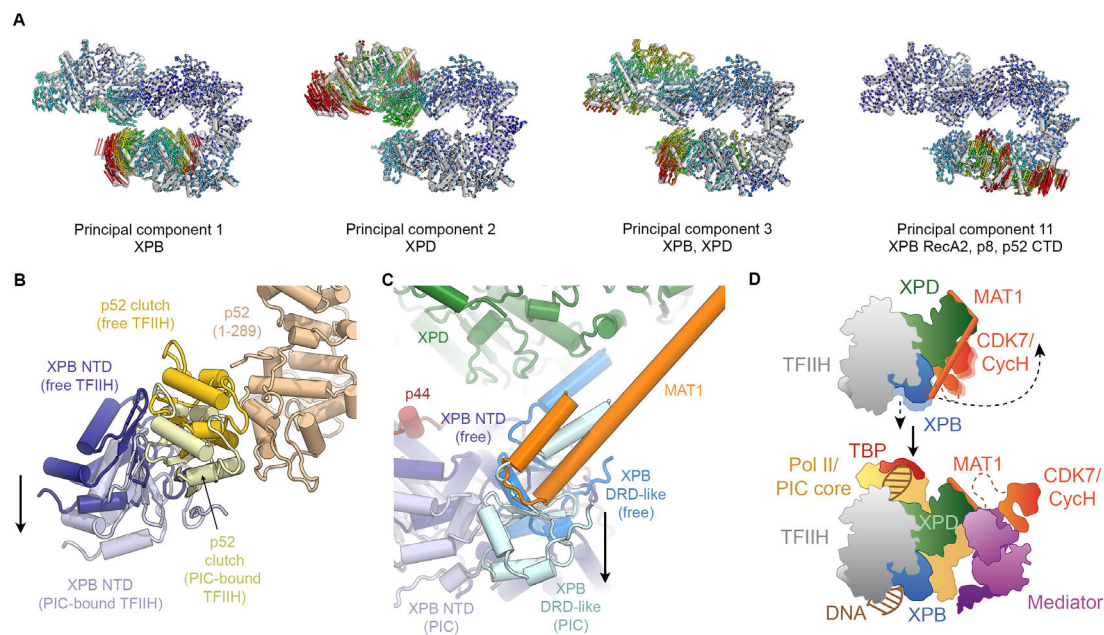

**Figure 4. Conformational dynamics of TFIIF.** (A) Results of multibody analysis. Several major modes of motion involve the enzymatic subunits of the TFIIF core complex or their domains. (B) Motion of the p52 clutch domain (closed conformation gold, open conformation light yellow) and associated XPB NTD (closed conformation blue, open conformation light blue) relative to the remainder of p52 (brown), based on comparison of free and PIC-bound TFIIF structures. (C) XPB motions from the closed conformation (free TFIIF; darker blue hues) and the open conformation (TFIIF-PIC; lighter hues). The MAT1-XPB contact dissociates during this rearrangement. (D) Schematic model for the conformational transitions in MAT1 and repositioning of the CAK kinase module during Pol II-PIC entry of TFIIF.

**Figure supplement 1.** Analysis of the conformational variance of TFIIF.

**Figure supplement 2.** Conformational dynamics of TFIIF and comparison with the PIC-bound TFIIF.

### Conformational dynamics of the TFIIF core complex

In order to investigate the dynamics of TFIIF, we analyzed the conformational landscape of the particles in our cryo-EM dataset (Figure 4A, Figure 4 – figure supplement 1) (Nakane et al., 2018). This analysis revealed the relative motions

of the two ATPases and their domains (Figure 4A). The major mode of motion, which involves the breaking of the interaction between XPB and XPD, resembles the conformational transition of TFIIH when it enters the Pol II-PIC and binds to DNA (Greber et al., 2017; He et al., 2016; Schilbach et al., 2017) (Figure 4 – figure supplement 2A-C). Analysis of our TFIIH structure and comparison with that of the complex within the Pol II-PIC maps (He et al., 2016; Schilbach et al., 2017) allowed us to identify a specific rearrangement at the interface between the clutch and adjacent winged helix domain in p52 (Figure 4B) as the basis of this conformational change. A structural unit composed of XPB, p8 and the clutch domain of p52 undergoes a downward motion upon DNA-binding within the Pol II-PIC (Figure 4B, Figure 4 – figure supplement 2B, C). This conformational change in TFIIH upon PIC entry also appears to break the interaction between MAT1 and the XPB DRD-like domain (Figure 4C), which in turn might serve to enable positioning of the CDK7-cyclin H dimer within the CAK subcomplex at the appropriate location for Pol II-CTD phosphorylation in the mediator-bound Pol II-PIC (Figure 4D) (Schilbach et al., 2017). Our structural comparison also reveals that a TFIIH-XPB interaction that has been implicated in XPB regulation (Schilbach et al., 2017) may depend on the existence of the open conformation of TFIIH, as there would be steric hindrance in a complex involving the closed conformation of TFIIH (Figure 4 – figure supplement 2D-F).

## Structure of XPD

The structure of XPD shows the conserved domain arrangement of two RecA-like domains (RecA1 and RecA2), with the FeS and ARCH domain insertions in RecA1 (Constantinescu-Aruxandei et al., 2016; Fan et al., 2008; Kuper et al., 2012). The quality of the map allowed us to interpret the density for the N- and C-termini of XPD, which closely approach each other near the nucleotide-binding site within RecA1 (Figure 5A). The N-terminus of XPD forms a short two-stranded  $\beta$ -sheet near the nucleotide-binding site in XPD RecA1 (which is empty in our structure) and may contribute to the stabilization of the bound nucleotide via the aromatic side chains of Y14 and Y18, the latter being affected by the Y18H mutation in an XP/TTD patient (Kralund et al., 2013) (Figure 5 – figure supplement 1A-C). The

XPD C-terminal segment runs along the side of XPD RecA2 and interacts with the linker between RecA1 and RecA2 (Figure 5 – figure supplement 1D). The C-terminal segment includes the site of the K751Q polymorphism (Figure 5 – figure supplement 1D), and deletion of this terminal segment causes XP in human patients (Cleaver et al., 1999).

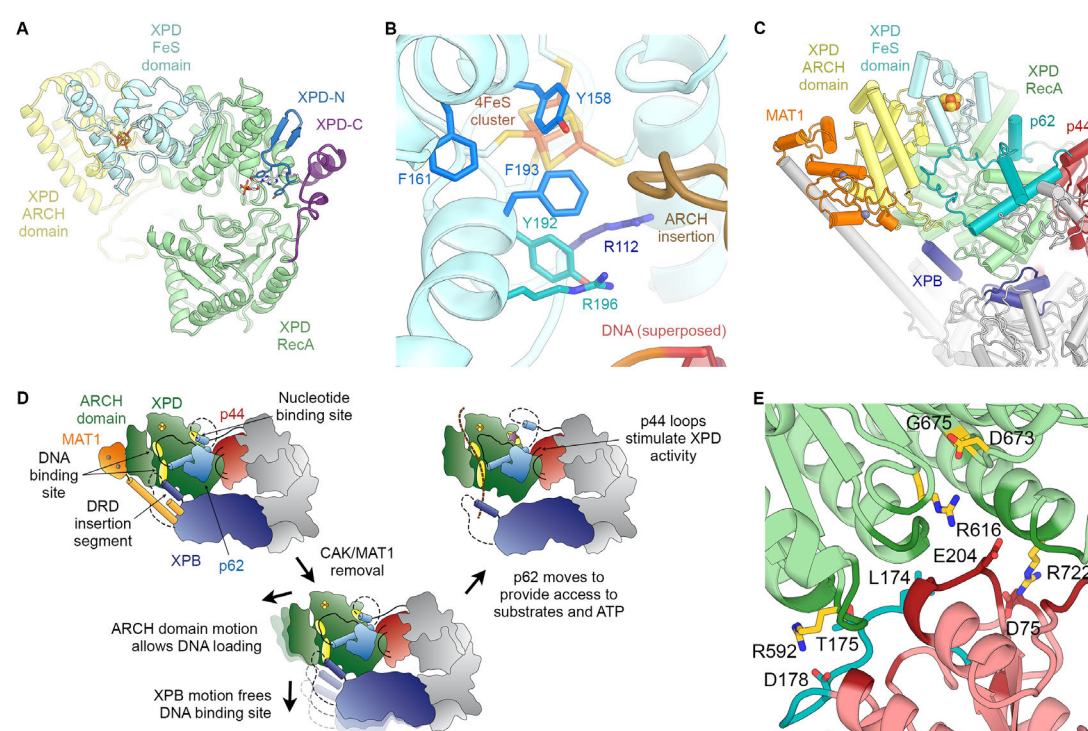

**Figure 5. Structure and regulation of XPD.** (A) Structure of XPD colored by domain. N- and C-terminal segments (blue and purple, respectively) of XPD are indicated. An ADP molecule (superposed from the structure of DinG (Cheng & Wigley, 2018)) denotes the nucleotide-binding pocket in XPD RecA1, which is empty in our structure. (B) Structure of the FeS domain. Residues critical for XPD enzymatic activity (blue) and damage verification (teal) are indicated. The R112H mutation causes TTD in human patients. ARCH domain insertion brown. DNA superposed from (Cheng & Wigley, 2018). (C) Interaction network of XPD with surrounding TFIIH subunits (interacting regions colored, remainder grey). (D) Cartoon model for repression and de-repression of XPD by MAT1, XPB, and p62. (E) XPD-p44 interacting regions (defined as residues within < 4 Å of the neighboring protein) are colored in dark green (XPD) and dark red (p44). Residues discussed in the text are shown as sticks; those with mutation data

(natural variants or experimental constructs) are colored yellow on XPD, teal on p44. The remainder of the  $\beta 4$ - $\alpha 5$  loop harboring the synthetic p44 mutations is colored teal as well.

**Figure supplement 1.** Structure of XPD.

**Figure supplement 2.** XPD-p44 interaction.

Before XPD-bound DNA reaches the helicase motifs in the RecA like domains, it passes through a pore-like structure next to the 4FeS cluster at the interface between the FeS and ARCH domains (Figure 5 – figure supplement 1E, F) (Cheng & Wigley, 2018; Constantinescu-Aruxandei et al., 2016; Kuper et al., 2012; Liu et al., 2008; Wolski et al., 2008). This region was poorly defined in previous TFIIH reconstructions, but our cryo-EM map now shows side-chain densities for the aromatic residues Y158, F161, and F193, which are critical for the DNA-binding, ATPase, and helicase activities of XPD (Kuper et al., 2014), as well as for residues Y192 and R196, which form part of a DNA lesion recognition pocket (Mathieu et al., 2013) (Figure 5B). This functionally important region is only partially conserved in archaeal XPD homologs (Figure 5 – figure supplement 1G-I) (Fan et al., 2008; Kuper et al., 2012; Wolski et al., 2008). A eukaryotic-specific loop insertion in the XPD ARCH domain (Greber et al., 2017; Schilbach et al., 2017) closely approaches this binding pocket (Figure 5B) and may serve to regulate the binding of DNA in the lesion recognition pocket such as to prevent untimely access of substrates to the XPD pore.

## **Interactions and regulation of XPD**

Our structure of TFIIH shows that XPD forms architectural and regulatory interactions with four other TFIIH subunits: XPB, p62, p44, and MAT1, which together form a cradle-like structure around XPD (Figure 5C). We described above two interactions that could potentially regulate XPD activity: the newly defined interaction of an insertion element in the XPB DRD with a DNA-binding site in XPD (Figure 3E, F); and XPD-p62 interactions involving the XPD nucleotide binding pocket and DNA binding cavity (Figure 2, Figure 2 – figure



supplement 1D-F) that implicate p62, as well as XPB, in XPD regulation. Additionally, it is known that the helicase activity of XPD is inhibited by the CAK subcomplex (Araújo et al., 2000; Sandroock & Egly, 2001). The contacts we see between MAT1 and XPD localize to the ARCH domain of XPD and the N-terminal RING domain and helical bundle of MAT1 (residues 1-210) (Figure 5C), in agreement with previous structural (Greber et al., 2017; Schilbach et al., 2017) and biochemical analysis (Abdulrahman et al., 2013; Luo et al., 2015; Warfield et al., 2016). The interaction between the XPD ARCH domain and the MAT1 helical bundle is characterized by charge complementarity (Figure 5 – figure supplement 1J-M). This interface is highly dynamic, enabling the release of MAT1 and the entire CAK subcomplex from TFIIH during NER, as well as its subsequent re-association to regenerate a transcription-competent TFIIH (Coin et al., 2008).

Insertion of substrate DNA into the pore between the XPD ARCH and FeS domains requires the flexibility of the XPD ARCH domain (Constantinescu-Aruxandei et al., 2016), and large domain motions have been observed in the structure of the DNA-bound homologous helicase DinG upon nucleotide binding (Cheng & Wigley, 2018). This suggests a role for the mobility of the ARCH domain in both DNA loading and DNA translocation by the XPD helicase. Our structure suggests that binding of the MAT1 helical bundle and RING domain to the ARCH domain may prevent such motion and therefore the subsequent substrate loading and XPD helicase activity (Figure 5D), in agreement with biochemical data that show XPD inhibition upon MAT1 binding (Sandroock & Egly, 2001), as well as reduced single-stranded DNA affinity of TFIIH in the presence of the CAK (Li et al., 2015). Conversely, release of MAT1 from XPD might allow the ARCH domain to move more freely, thereby de-repressing XPD. Furthermore, displacement of the MAT1  $\alpha$ -helix that connects XPD to XPB may allow XPB to move away from XPD, thereby unmasking the substrate-binding site on XPD RecA2 that is otherwise occluded by the DRD insertion element (Figure 5D). This latter conformational change would be similar, overall, to that seen for TFIIH upon incorporation into the Pol II-PIC, where XPD and XPB move apart and density for the MAT1 helix is missing (Figure 4C) (He et al., 2016; Schilbach et al., 2017). We propose that the combined unmasking of the XPD

substrate binding site and the enhanced flexibility of the XPD ARCH domain may both contribute to de-repression of the XPD helicase upon release of MAT1. This mechanism of XPD inhibition by MAT1 does not exclude the possibility of additional repression of NER activity by the CAK subcomplex through phosphorylation of NER pathway components (Araújo et al., 2000).

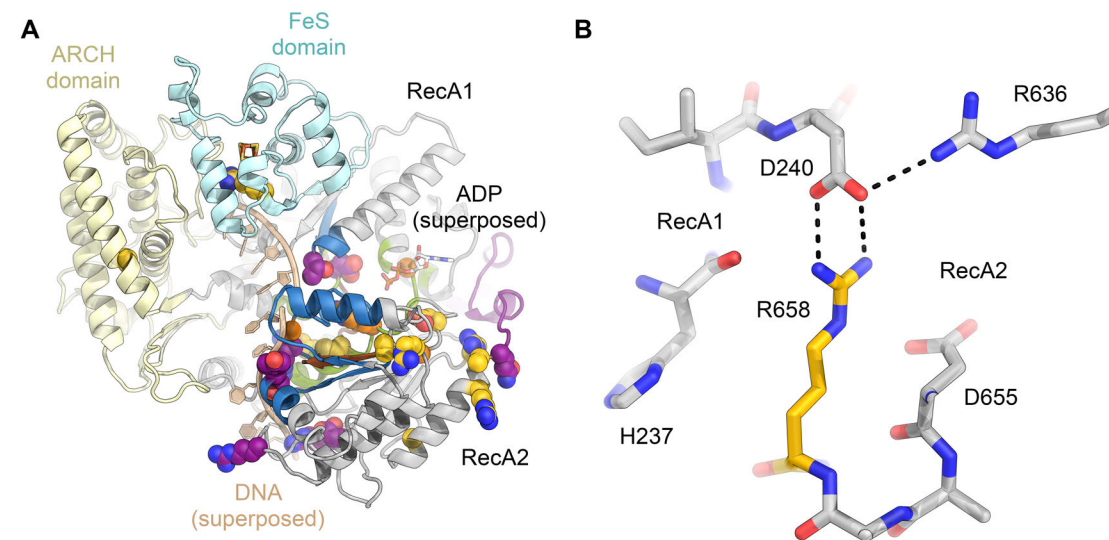

**Figure 6. Disease mutations in XPD.** (A) Residues affected by disease mutations are shown as spheres (XP purple; TTD yellow; CS-XP orange). Conserved helicase elements for DNA binding are shown in blue, for nucleotide binding and hydrolysis in green, and for coupling of nucleotide hydrolysis and DNA translocation in brown. DNA superposed from (Cheng & Wigley, 2018). (B) Salt bridge between R658 (RecA2) and D240 (RecA1) visualized in our structure that is affected by the temperature sensitive TTD mutation R658C (Vermeulen et al., 2001).

**Figure supplement 1.** Mapping of XPD disease mutations on the TFIIH structure.

Our structure also resolves in detail the XPD-p44 interaction, a known regulatory interface (Dubaele et al., 2003; Kim et al., 2015; Kuper et al., 2014) affected by numerous disease mutations (Cleaver et al., 1999; Greber et al., 2017; Kuper et al., 2014) (Figure 5E). The relatively small interaction surface between p44 and XPD, of just 1010 Å<sup>2</sup> (Figure 5 – figure supplement 2A), contrasts with the much

larger buried surface of 3370 Å<sup>2</sup> between XPD and p62, or 1570 Å<sup>2</sup> for the p52-XPB interaction. This smaller interaction surface may result in higher sensitivity to mutations that localize at the XPD-p44 interface. Our structure, thus, rationalizes the deleterious effect of a number of natural and synthetic mutations in this interface (Supplementary Note 1, Figure 5 – figure supplement 2B-E), including mutations L174W and T175R in the β4-α5 loop of p44 (Figure 5E) (Kim et al., 2015; Seroz et al., 2000), which may lead to steric clashes in the densely packed interface (Figure 5 – figure supplement 2B), and the XPD R722W mutation (Kuper et al., 2014), which disrupts the salt bridge with D75 in p44 and may additionally cause steric clashes with neighboring p44 residues due to the bulky tryptophan side chain (Figure 5 – figure supplement 2C). Our structure also shows that, in contrast to a previously proposed model (Luo et al., 2015), the XPD R616P, D673G, and G675R disease mutations act either via disruption of the XPD structure or the XPD-p44 interface, but not via disruption of the interaction with p62 (see Supplementary Note 1, Figure 5 – figure supplement 2D). Notably, the p44-dependent stimulation of XPD activity does not depend on the presence of p62 (Dubaele et al., 2003; Kim et al., 2015; Kuper et al., 2014). We were also able to map a number of disease mutations onto our XPD structure (Figure 6A) and analyze in detail the interactions involving the affected residues (example shown in Figure 6B). Our analysis confirms that XP mutations mostly localize near the helicase substrate-binding or active sites, while TTD mutations predominantly localize to the periphery of XPD (Figure 6, Figure 6 – figure supplement 1) (Fan et al., 2008; Liu et al., 2008), where they disrupt TFIIH assembly and cause the transcription defects that are a hallmark of this disease (Dubaele et al., 2003) (Supplementary Note 2).

## DISCUSSION

Our study reveals the complete structure of the TFIIH core complex and provides mechanistic insights into the regulation of its two component helicases. Specifically, it shows XPD wrapped by numerous interactions with XPB, p62, p44, and MAT1 (Figure 5C, D), indicating how its activity can be tightly controlled and de-repressed only when its enzymatic function is needed. XPD activity is not



needed and most likely inhibited during transcription initiation, but it may also be tightly controlled during NER, when repair bubble opening and lesion verification need to be coordinated with the recruitment and activation of the damage recognition and processing machinery (Figure 7 and Discussion). While the regulation of XPD by MAT1 and p44 has been studied in some detail, and the domain motions in TFIIH suggest a straightforward mechanism for liberating the substrate-binding site on XPD RecA2, less was known about the interplay between XPD and p62. Our structure now shows how p62 is able to impede both substrate and nucleotide binding in XPD RecA1, and hints at dynamic structural changes of p62 during de-repression and enzymatic activity of XPD, possibly regulated by other components of the transcription or NER pathways.

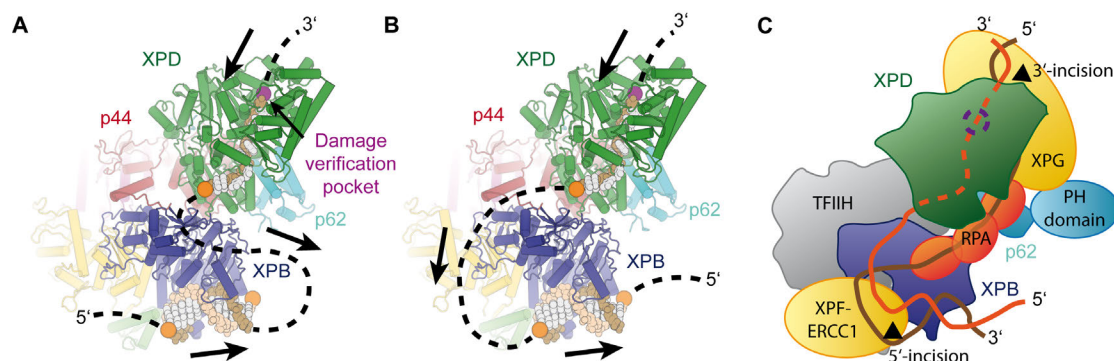

**Figure 7. Implications for assembly of the repair bubble during NER.** (A) Schematic of DNA-bound TFIIH (DNA damage verification pocket in XPD and DNA 5'-phosphates indicated by purple and orange spheres, respectively) Binding of both XPD and XPB to the damaged strand would lead to extrusion of a bubble when XPD scans in the 5'-3' direction, while XPB may be stationary or contribute to bubble extrusion if translocating in the 3'-5' direction (DNA superposed from PDB IDs 6FWR, 5OQJ (Cheng & Wigley, 2018; Schilbach et al., 2017)). (B) Binding of XPD to the undamaged strand would enable the entire complex to scan in 5'-3' direction, given the opposing polarities of the two ATPases/helicases involved. (C) Model for the assembled repair bubble. Positions of NER factors are approximate. XPG-p62 PH domain interaction according to (Gervais et al., 2004). See Discussion for details.

Our results allow us to put extensive biochemical data on the NER pathway into a structural context (Figure 7). Depending on whether XPB binds to the damaged (Figure 7A) or undamaged (Figure 7B) strand, the combined action of XPD and XPB could lead to the extrusion of a DNA bubble (Figure 7A) or to the tracking of the entire complex towards the lesion (Figure 7B), which is initially located 3' of the TFIIH binding site (Sugasawa et al., 2009). The latter hypothesis is attractive in the context of biochemical data that show that XPD tracks along the damaged strand in the 5' to 3' direction until it encounters the DNA lesion in order to verify the presence of a bona fide NER substrate (Buechner et al., 2014; Li et al., 2015; Mathieu et al., 2013; Naegeli et al., 1993; Sugasawa et al., 2009; Wirth et al., 2016). It is worth noting that the length of DNA fragments excised during NER is approx. 29 nt, with 22 nt located 5' and 5 nt located 3' of a thymine dimer lesion (Huang et al., 1992). According to our structure, the 22 nt 5'-fragment corresponds well to the estimated 20 nt of DNA that are required to span the distance from the DNA damage verification pocket in XPD (Mathieu et al., 2013) to the helicase elements of XPB. This proposal is compatible with a model in which TFIIH sitting on the open repair bubble might track towards the lesion, where it would stop due to inhibition of XPD (Li et al., 2015; Mathieu et al., 2013; Naegeli et al., 1993), at which point double incision could be initiated. However, this model (Figure 7B) would require strong DNA bending before both XPB and XPD could be loaded. Additionally, it has not been fully resolved whether XPB participates in DNA translocation or unwinding during TFIIH activity in NER (Li et al., 2015), which would be required in the tracking model (Li et al., 2015), or whether it exclusively acts to anchor the complex in the vicinity of the DNA lesion (Coin et al., 2007; Oksenych et al., 2009).

Independently of the orientation of the repair bubble, our structural data are compatible with literature data introduced above and a model (Figure 7C) that localizes XPG near XPD and p62 (site of 3'-incision), XPF-ERCC1 near XPB (site of 5'-incision), and with RPA binding the non-damaged strand (Fagbemi et al., 2011). We have currently not included XPA in this model because its interactions with distinct partners or participation in various processes, such as involvement in CAK release (Coin et al., 2008), binding to p8 (Ziani et al., 2014), and

participation in helicase stalling after lesion recognition (Li et al., 2015), suggest its localization to various, often distant sites on TFIIH, or the repair bubble in general (Sugitani et al., 2016).

In summary, our structure of the human TFIIH core complex reveals the interactions that govern the architecture and function of this molecular machine, provides new insights into the regulation of its enzymatic subunits, and thus constitutes an excellent framework for further mechanistic studies of TFIIH in the context of larger DNA repair and transcription assemblies.

## **METHODS**

### **TFIIH purification, cryo-EM specimen preparation, and data collection**

TFIIH was purified and cryo-EM grids were prepared on carbon-coated C-flat CF 4/2 holey carbon grids (Protochips) using a Thermo Fisher Scientific Vitrobot Mk. IV, as previously described (Greber et al., 2017). To improve on our previous 4.4 Å cryo-EM map of human TFIIH (Greber et al., 2017), which was based on 4 cryo-EM datasets (3 of which were retained in the 4.4 Å reconstruction, datasets 8-10 in Supplementary Table 1) from a Titan microscope (Thermo Fisher Scientific) equipped with a side-entry holder (Gatan) and a K2 Summit direct electron detector (Gatan), we collected new data (dataset 7 in Supplementary Table 1) on a Titan KRIOS microscope (Thermo Fisher Scientific) operated at 300 kV extraction voltage and equipped with a Cs-corrector, a K2 Summit direct electron detector (Gatan) operated in super-resolution counting mode, and a Quantum energy filter (Gatan). This dataset was collected under the same imaging conditions as our previous data (i.e. 37,879 x magnification resulting in 1.32 Å pixel size, and at a total exposure of 40 e<sup>-</sup> Å<sup>-2</sup>), except for the change of microscope. Datasets 7-10 could be combined to yield a cryo-EM map at 4.3 Å resolution (not shown), however, this did not lead to a substantial improvement in map quality, suggesting that particle alignment quality was limiting. We therefore opted to collect further data on a Titan KRIOS electron microscope (Thermo Fisher Scientific) operated at 300 kV acceleration voltage and equipped

with a Volta Phase Plate (VPP), a Gatan Quantum energy filter (operated at 20 eV slit width), and a Gatan K2 Summit direct electron detector (operated in super-resolution counting mode). VPP data (datasets 1-6 in Supplementary Table 1) were collected according to the defocus acquisition technique (Danev & Baumeister, 2017; Khoshouei et al., 2017) at 43,478 x magnification, resulting in a physical pixel size of 1.15 Å on the object scale, with a total electron exposure of 50 e<sup>-</sup> Å<sup>-2</sup> at an exposure rate of 6.1 e<sup>-</sup> Å<sup>-2</sup> s<sup>-1</sup> during an exposure time of 8.25 s, dose fractionated into 33 movie frames (50 frames for dataset 6). Data collection was monitored on-the-fly using FOCUS (Biyani et al., 2017) to ensure proper evolution of the VPP-induced phase shift.

## **Cryo-EM data processing**

Initially, we used data collected in 10 microscopy sessions, 6 sessions using the VPP and 4 sessions without the VPP, resulting in > 30'000 total micrographs, of which approx. 15,000 were retained after inspection of the quality of Thon rings and CTF fitting (for details, see Supplementary Table 1). Movie stacks were aligned and dose weighed using MOTIONCOR2 (Zheng et al., 2017). The aligned, dose weighed sums from the datasets collected at 1.32 Å pixel size (datasets 7-10) were up-sampled to 1.15 Å per pixel to match the scale of the micrographs collected using the VPP (datasets 1-6) after calibrating the two magnifications to each other based on 3D reconstructions computed from the two types of data. CTF parameters were estimated using GCTF (Zhang, 2016) and particles were picked using GAUTOMATCH (Kai Zhang, MRC Laboratory of Molecular Biology, Cambridge UK) or RELION (Scheres, 2015) using templates generated from a preliminary run without reference templates. All subsequent data processing was performed in RELION 2 (Kimanius et al., 2016; Scheres, 2012) or RELION 3 (Nakane et al., 2018; Zivanov et al., 2018).

To remove false positive particle picks and broken particles, initial 3D classification was performed on each dataset individually (datasets 3, 4, 5), or on a few pooled datasets if appropriate (datasets 1 and 2 were pooled as they used the same batch of specimen; the non-VPP datasets 7-10 were joined because only

few micrographs were retained due to more stringent quality criteria compared to our previous study; and dataset 6 was initially classified together with particles from dataset 4 to compensate for particle orientation bias, see Figure 1 – figure supplement 1). In summary, a total of > 2,000,000 initial particle picks were subjected to this initial 3D classification, identifying approx. 820,000 intact particles that were subjected to further processing. After 3D auto-refinement and another round of 3D classification, performed separately for the VPP and non-VPP data because the two data types were spuriously separated into distinct classes in combined RELION 3D classification runs, the best classes (one from VPP and non-VPP data each) resulting from the high-resolution 3D classifications were refined according to the gold-standard refinement procedure (fully independent half-sets), resulting in a 3.9 Å-resolution reconstruction according to the FSC = 0.143 criterion (Rosenthal & Henderson, 2003; Scheres & Chen, 2012). Beam tilt refinement in RELION 3 (Zivanov et al., 2018) improved the map computed from the VPP data to 3.7 Å resolution. The non-VPP data no longer improved the reconstruction after beam tilt correction and was therefore discarded at this point. The final map was post-processed by application of b-factor of -175 Å<sup>2</sup> and low-pass filtration to the nominal 3.7 Å resolution for visualization and later coordinate refinement.

To facilitate the interpretation of less ordered or only partially occupied parts of the structure, including the p62 BSD2 domain, the MAT1 RING domain, the MAT1 three-helix bundle at the XPD arch domain, and the N-terminus of XPD, we used signal subtracted classification (Bai et al., 2015; Nguyen et al., 2015) (p62 BSD2 domain, Figure 1 – figure supplement 3), focused classification (MAT1 RING domain, Figure 1 – figure supplement 4), and multibody refinement (Nakane et al., 2018) (MAT1 three-helix bundle and XPD N-terminus, Figure 1 – figure supplement 5). For these classification procedures, we used only the VPP data because 3D classification separated VPP and conventional cryo-EM data into distinct classes, rendering combined classification ineffective. Multibody refinement led to only a slight improvement in resolution (to 3.6 Å) relative to the overall refined best map, and only during the first two iterations, likely due to the relatively small size of the individual bodies and the resulting limited

signal for alignment. However, the above-mentioned structural elements showed improved density features (Figure 1 – figure supplement 1B) and could be more reliably interpreted in the multibody-refined XPD-MAT1 map (green in Figure 1 – figure supplement 5; also used in Figure 1 – figure supplement 2E, F). Overall, the use of VPP data in this work resulted in substantial improvements both in nominal resolution (Figure 1 – figure supplement 2D) and map quality (Figure 1 – figure supplement 2E-G) compared to our previous 4.4 Å-resolution structure.

## Model building and refinement

The previous structure of the human TFIIH core complex (Greber et al., 2017) and of yeast TFIIH in the Pol II-PIC (Schilbach et al., 2017) were docked into the cryo-EM map and used as the basis for atomic modeling in O (Jones et al., 1991) and COOT (Emsley et al., 2010). In addition to these models, the structure of the human p34 VWFA-p44 RING domain complex (Radu et al., 2017), the N-terminal RING domain of MAT1 (Gervais et al., 2001), the C-terminal RecA-like domain of human XPB (Hilario et al., 2013) and several homology models for the p52 winged-helix domains generated using the PHYRE2 web server (Kelley et al., 2015) based on templates PDB IDs 3F60 and 1STZ (Liu et al., 2005) were used for model building.

*Building of 52:* The structure of p52 was traced and built completely *de novo*, with the exception of the winged-helix domains and the very C-terminal domain, where a homology model was placed into the cryo-EM map together with the p8 structure (Kainov et al., 2008; Vitorino et al., 2007) and adjusted to the density.

*XPB:* The structure of the XPB NTD was also built *de novo*, the structure of the DRD was extensively re-built, and the RecA-like domains were rebuilt to improve the fit to the density.

*XPD:* The improved cryo-EM map enabled detailed re-building of XPD, including correction of register shifts in the more poorly ordered regions of the protein and extension of the termini.



*MAT1*: The N-terminal MAT1 RING domain (Gervais et al., 2001) was first docked into the focused classified density and combined with the rest of the TFIIH model, where it helped guide the assignment of the sequence register to the MAT1 model, in combination with density features of large side chains in the helical regions.

*Building of p34*: The human p34 structure (Radu et al., 2017) was docked into the map as is, extended near the interaction site with p52, and combined with a completely re-built model of the C-terminal eZnF domain (Schilbach et al., 2017).

*Building of p44*: The p44 VWFA fold needed only minor rebuilding and was combined with the eZnF domain and the C-terminal human RING domain model (Radu et al., 2017; Schilbach et al., 2017). The p44 NTE was built according to the density at the contact site with XPB and guided by CX-MS data (Luo et al., 2015). Both the features of the cryo-EM map and crosslinks of the p44 NTE to p34, p52, and XPB (Figure 1 – figure supplement 6E) unambiguously confirm the tracing of this segment towards the XPB NTD, rather than alternative tracing towards XPD (this density is now assigned to p62, in agreement with p62-XPD crosslinks; see below and Figure 1 – figure supplement 6G).

*Building of p62*: The p62 protein was modeled based on the placement of the BSD domains (PDB ID 2DII), secondary structure prediction, extension of docked coordinates (Greber et al., 2017; Schilbach et al., 2017), and new tracing of the protein chain. Placement of the regions near XPD, where density is weak overall, was guided by matching the succession of secondary structure elements along the p62 sequence with helical densities in the cryo-EM map (Figure 2 – figure supplement 1A), and corroborated by CX-MS data (Luo et al., 2015), which showed excellent agreement of p62-XPD crosslinking data with the structure (Figure 1 – figure supplement 6G). Crosslinks between p62 and p44 showed a relatively large proportion of outliers (Supplementary Data Table 1), which may be due to the fact that the sequence register of the p62 segments to which these crosslinks map is not well constrained. These segments were modeled as poly-

alanines and deposited without sequence assignment (UNK; Supplementary Table 2). Maps low-pass filtered to 6 Å and sharpened by a b-factor of only -100 Å<sup>2</sup> were used to guide docking of domains and assess the continuity of the density in poorly ordered regions of the protein (Figure 2 – figure supplement 1B, C).

The resulting coordinate model (Supplementary Table 2) was refined using the real space refinement program in PHENIX (Adams et al., 2010; Afonine et al., 2018) and validated using the MTRIAGE program in PHENIX and the MOLPROBITY web server (Chen et al., 2010). Ramachandran, C<sub>β</sub>, rotamer, and secondary structure restraints were used throughout the refinement to ensure good model geometry at the given resolution. Data used in the refinement excluded spatial frequencies beyond the nominal 3.7 Å resolution of the cryo-EM map to prevent over-fitting. The N-terminal RING domain of MAT1 and the BSD1 domain of p62, for which only poorly resolved density is present in the final cryo-EM map, were additionally restrained by reference restraints (Headd et al., 2012) using the NMR structures of the corresponding domains (PDB ID 1G25 and 2DII, respectively) (Gervais et al., 2001). The side chains of these two domains (with the exception of residues involved in zinc finger formation and of prolines) were truncated at the C<sub>β</sub> position to reflect the lower resolution of the corresponding densities. The FSC curve between the refined coordinate model and the cryo-EM map extends to 3.9 Å and the distribution of b-factors in the refined coordinate model (Figure 1 – figure supplement 2C) mirror the local resolution of the cryo-EM map (Figure 1 – figure supplement 2D), as expected. Refinement statistics are given in Supplementary Table 3 and are typical for structures in this resolution range (97<sup>th</sup> and 99<sup>th</sup> percentiles for MOLPROBITY clash score and overall score (Chen et al., 2010)).

## **Flexibility analysis**

For the analysis of conformational dynamics of TFIIH, VPP datasets 1 and 2 were subjected to multibody refinement in RELION 3 (Nakane et al., 2018) using 6 masks (Figure 4 – figure supplement 1). The volume series for the first 16



principal components were reconstructed and difference densities (green and purple in Figure 4 – figure supplement 1) were computed between the most extreme states in each series (blue and yellow in Figure 4 – figure supplement 1). Subsequently, roughly 20,000 particles corresponding to both ends of the distribution were used for selected principal components and subjected to 3D refinement, resulting in maps of approx. 10 Å resolution. The refined atomic model of the TFIID core complex, subdivided into suitable rigid bodies, was then rigid-body refined into these volumes using PHENIX real space refinement (Afonine et al., 2018) and coordinate displacement between the two resulting models for each principal component was plotted to obtain an initial assessment of the modes of motion present in the TFIID dataset (Figure 4A). For actual structural interpretation (Figure 4B, C), the final cryo-EM maps of the TFIID core complex (this work) and TFIID in the context of the Pol II-PIC (Schilbach et al., 2017) were used.

## Other

Figures were created using PyMol (The PyMOL Molecular Graphics System, Version 1.8 Schrödinger, LLC.) and the UCSF Chimera package from the Computer Graphics Laboratory, University of California, San Francisco (supported by NIH P41 RR-01081) (Pettersen et al., 2004). Protein-protein interface statistics were determined using PISA (Krissinel & Henrick, 2007).

## ACKNOWLEDGMENTS

We thank D. Wigley for sharing of structural data, S. Scheres for sharing computer code before publication, R. Tjian, S. Zheng, and D. King for supplying XPB mAB and peptides for TFIID purification, P. Grob for microscopy support, A. Chintangal and P. Tobias for computing support, and Z. Yu and C. Hong for data collection at the Janelia farm cryo-EM facility. We acknowledge the use of the resources of the National Energy Research Scientific Computing Center (NERSC), a DOE Office of Science user facility supported by the Office of Science of the U.S. Department of Energy under Contract No. DE-AC02-05CH11231.

## ADDITIONAL INFORMATION

### Funding

This work was funded through NIGMS grants R01-GM63072 and P01-GM063210 to E.N.. B.J.G. was supported by fellowships from the Swiss National Science Foundation (projects P300PA\_160983, P300PA\_174355). E.N. is a Howard Hughes medical investigator.

### Author contributions

E.N. directed the study. J.F. performed HeLa cell culture and purified TFIIH. B.J.G. performed cryo-EM specimen preparation, data processing, atomic model building, and coordinate refinement. D.B.T and B.J.G collected the cryo-EM data. B.J.G. wrote the initial draft of the manuscript and all authors contributed to the final version.

### Supplementary Data Table 1 (separate file)

Result summary of mapping of CX-MS data (Luo et al., 2015) onto the TFIIH structure.

## REFERENCES

- Abdulrahman W., Iltis I., Radu L., Braun C., Maglott-Roth A., Giraudon C., Egly J.-M., Poterszman A. (2013) ARCH domain of XPD, an anchoring platform for CAK that conditions TFIIH DNA repair and transcription activities. *Proc Natl Acad Sci USA* **110**: E633-642
- Adams P. D., Afonine P. V., Bunkóczi G., Chen V. B., Davis I. W., Echols N., Headd J. J., Hung L. W., Kapral G. J., Grosse-Kunstleve R. W. et al (2010) PHENIX: a comprehensive Python-based system for macromolecular structure solution. *Acta Crystallogr D Biol Crystallogr* **66**: 213-221

881 Afonine P. V., Poon B. K., Read R. J., Sobolev O. V., Terwilliger T. C., Urzhumtsev A.,  
882 Adams P. D. (2018) Real-space refinement in PHENIX for cryo-EM and  
883 crystallography. *Acta Crystallogr D Struct Biol* **74**: 531-544

884 Alekseev S., Nagy Z., Sandoz J., Weiss A., Egly J.-M., Le May N., Coin F. (2017)  
885 Transcription without XPB Establishes a Unified Helicase-Independent  
886 Mechanism of Promoter Opening in Eukaryotic Gene Expression. *Mol Cell* **65**:  
887 504-513.e505

888 Araújo S. J., Tirode F., Coin F., Pospiech H., Syväoja J. E., Stucki M., Hübscher U.,  
889 Egly J. M., Wood R. D. (2000) Nucleotide excision repair of DNA with  
890 recombinant human proteins: definition of the minimal set of factors, active  
891 forms of TFIIH, and modulation by CAK. *Genes & Dev* **14**: 349-359

892 Bai X.-C., Rajendra E., Yang G., Shi Y., Scheres S. H. (2015) Sampling the  
893 conformational space of the catalytic subunit of human  $\gamma$ -secretase. *Elife* **4**:  
894 e11182

895 Balasingham S. V., Zegeye E. D., Homberset H., Rossi M. L., Laerdahl J. K., Bohr V.  
896 A., Tønjum T. (2012) Enzymatic activities and DNA substrate specificity of  
897 Mycobacterium tuberculosis DNA helicase XPB. *PLoS ONE* **7**: e36960

898 Berico P., Coin F. (2017) Is TFIIH the new Achilles heel of cancer cells?  
899 *Transcription* **9**: 47-51

900 Bienstock R. J., Skorvaga M., Mandavilli B. S., Van Houten B. (2003) Structural and  
901 functional characterization of the human DNA repair helicase XPD by  
902 comparative molecular modeling and site-directed mutagenesis of the bacterial  
903 repair protein UvrB. *J Biol Chem* **278**: 5309-5316

904 Biyani N., Righetto R. D., McLeod R., Caujolle-Bert D., Castaño-Diez D., Goldie K.  
905 N., Stahlberg H. (2017) Focus: The interface between data collection and data  
906 processing in cryo-EM. *J Struct Biol* **198**: 124-133

907 Botta E., Nardo T., Lehmann A. R., Egly J.-M., Pedrini A. M., Stefanini M. (2002)  
908 Reduced level of the repair/transcription factor TFIIH in trichothiodystrophy.  
909 *Hum Mol Genet* **11**: 2919-2928

910 Buechner C. N., Heil K., Michels G., Carell T., Kisker C., Tessmer I. (2014) Strand-  
911 specific recognition of DNA damages by XPD provides insights into nucleotide  
912 excision repair substrate versatility. *J Biol Chem* **289**: 3613-3624

913 Busso D., Keriel A., Sandrock B., Poterszman A., Gileadi O., Egly J. M. (2000)  
914 Distinct regions of MAT1 regulate cdk7 kinase and TFIIH transcription activities.  
915 *J Biol Chem* **275**: 22815-22823

916 Büttner K., Nehring S., Hopfner K.-P. (2007) Structural basis for DNA duplex  
917 separation by a superfamily-2 helicase. *Nat Struct Mol Biol* **14**: 647-652

918 Chen V. B., Arendall W. B., Headd J. J., Keedy D. A., Immormino R. M., Kapral G. J.,  
919 Murray L. W., Richardson J. S., Richardson D. C. (2010) MolProbity: all-atom

920 structure validation for macromolecular crystallography. *Acta Crystallogr D Biol*  
921 *Crystallogr* **66**: 12-21

922 Cheng K., Wigley D. B. (2018) DNA translocation mechanism of an XPD family  
923 helicase. *Elife* **7**

924 Clarkson S. G., Wood R. D. (2005) Polymorphisms in the human XPD (ERCC2)  
925 gene, DNA repair capacity and cancer susceptibility: an appraisal. *DNA Repair*  
926 *(Amst)* **4**: 1068-1074

927 Cleaver J. E., Thompson L. H., Richardson A. S., States J. C. (1999) A summary of  
928 mutations in the UV-sensitive disorders: xeroderma pigmentosum, Cockayne  
929 syndrome, and trichothiodystrophy. *Hum Mutat* **14**: 9-22

930 Coin F., Marinoni J. C., Rodolfo C., Fribourg S., Pedrini A. M., Egly J. M. (1998)  
931 Mutations in the XPD helicase gene result in XP and TTD phenotypes, preventing  
932 interaction between XPD and the p44 subunit of TFIIH. *Nat Genet* **20**: 184-188

933 Coin F., Oksenysh V., Egly J.-M. (2007) Distinct roles for the XPB/p52 and  
934 XPD/p44 subcomplexes of TFIIH in damaged DNA opening during nucleotide  
935 excision repair. *Mol Cell* **26**: 245-256

936 Coin F., Oksenysh V., Mocquet V., Groh S., Blattner C., Egly J.-M. (2008) Nucleotide  
937 excision repair driven by the dissociation of CAK from TFIIH. *Mol Cell* **31**: 9-20

938 Coin F., Proietti De Santis L., Nardo T., Zlobinskaya O., Stefanini M., Egly J.-M.  
939 (2006) p8/TTD-A as a repair-specific TFIIH subunit. *Mol Cell* **21**: 215-226

940 Compe E., Egly J.-M. (2016) Nucleotide Excision Repair and Transcriptional  
941 Regulation: TFIIH and Beyond. *Annu Rev Biochem* **85**: 265-290

942 Constantinescu-Aruxandei D., Petrovic-Stojanovska B., Penedo J. C., White M. F.,  
943 Naismith J. H. (2016) Mechanism of DNA loading by the DNA repair helicase XPD.  
944 *Nucleic Acids Res* **44**: 2806-2815

945 Danev R., Baumeister W. (2017) Expanding the boundaries of cryo-EM with  
946 phase plates. *Curr Opin Struct Biol* **46**: 87-94

947 Devault A., Martinez A. M., Fesquet D., Labbé J. C., Morin N., Tassan J. P., Nigg E. A.,  
948 Cavadore J. C., Dorée M. (1995) MAT1 ('menage à trois') a new RING finger  
949 protein subunit stabilizing cyclin H-cdk7 complexes in starfish and *Xenopus* CAK.  
950 *EMBO J* **14**: 5027-5036

951 Di Lello P., Jenkins L. M. M., Jones T. N., Nguyen B. D., Hara T., Yamaguchi H.,  
952 Dikeakos J. D., Appella E., Legault P., Omichinski J. G. (2006) Structure of the  
953 Tfb1/p53 complex: Insights into the interaction between the p62/Tfb1 subunit  
954 of TFIIH and the activation domain of p53. *Mol Cell* **22**: 731-740

955 Di Lello P., Miller Jenkins L. M., Mas C., Langlois C., Malitskaya E., Fradet-Turcotte  
956 A., Archambault J., Legault P., Omichinski J. G. (2008) p53 and TFIIH $\alpha$  share a

957 common binding site on the Tfb1/p62 subunit of TFIIH. *Proc Natl Acad Sci USA*  
958 **105**: 106-111

959 Drapkin R., Le Roy G., Cho H., Akoulitchiev S., Reinberg D. (1996) Human cyclin-  
960 dependent kinase-activating kinase exists in three distinct complexes. *Proc Natl*  
961 *Acad Sci USA* **93**: 6488-6493

962 Dubaele S., Proietti De Santis L., Bienstock R. J., Keriell A., Stefanini M., Van Houten  
963 B., Egly J.-M. (2003) Basal transcription defect discriminates between xeroderma  
964 pigmentosum and trichothiodystrophy in XPD patients. *Mol Cell* **11**: 1635-1646

965 Emsley P., Lohkamp B., Scott W. G., Cowtan K. (2010) Features and development  
966 of Coot. *Acta Crystallogr D Biol Crystallogr* **66**: 486-501

967 Evans E., Moggs J. G., Hwang J. R., Egly J. M., Wood R. D. (1997) Mechanism of  
968 open complex and dual incision formation by human nucleotide excision repair  
969 factors. *EMBO J* **16**: 6559-6573

970 Fagbemi A. F., Orelli B., Schärer O. D. (2011) Regulation of endonuclease activity  
971 in human nucleotide excision repair. *DNA Repair (Amst)* **10**: 722-729

972 Fairman-Williams M. E., Guenther U.-P., Jankowsky E. (2010) SF1 and SF2  
973 helicases: family matters. *Curr Opin Struct Biol* **20**: 313-324

974 Fan L., Arvai A. S., Cooper P. K., Iwai S., Hanaoka F., Tainer J. A. (2006) Conserved  
975 XPB core structure and motifs for DNA unwinding: implications for pathway  
976 selection of transcription or excision repair. *Mol Cell* **22**: 27-37

977 Fan L., Fuss J. O., Cheng Q. J., Arvai A. S., Hammel M., Roberts V. A., Cooper P. K.,  
978 Tainer J. A. (2008) XPD helicase structures and activities: insights into the cancer  
979 and aging phenotypes from XPD mutations. *Cell* **133**: 789-800

980 Fishburn J., Tomko E., Galburt E., Hahn S. (2015) Double-stranded DNA  
981 translocase activity of transcription factor TFIIH and the mechanism of RNA  
982 polymerase II open complex formation. *Proc Natl Acad Sci USA* **112**: 3961-3966

983 Fisher R. P., Jin P., Chamberlin H. M., Morgan D. O. (1995) Alternative  
984 mechanisms of CAK assembly require an assembly factor or an activating kinase.  
985 *Cell* **83**: 47-57

986 Fisher R. P., Morgan D. O. (1994) A novel cyclin associates with MO15/CDK7 to  
987 form the CDK-activating kinase. *Cell* **78**: 713-724

988 Fregoso M., Lainé J.-P., Aguilar-Fuentes J., Mocquet V., Reynaud E., Coin F., Egly J.-  
989 M., Zurita M. (2007) DNA repair and transcriptional deficiencies caused by  
990 mutations in the Drosophila p52 subunit of TFIIH generate developmental  
991 defects and chromosome fragility. *Mol Cell Biol* **27**: 3640-3650

992 Gervais V., Busso D., Wasielewski E., Poterszman A., Egly J. M., Thierry J. C.,  
993 Kieffer B. (2001) Solution structure of the N-terminal domain of the human

994 TFIIH MAT1 subunit: new insights into the RING finger family. *J Biol Chem* **276**:  
995 7457-7464

996 Gervais V., Lamour V., Jawhari A., Frindel F., Wasielewski E., Dubaele S., Egly J.-M.,  
997 Thierry J.-C., Kieffer B., Poterszman A. (2004) TFIIH contains a PH domain  
998 involved in DNA nucleotide excision repair. *Nat Struct Mol Biol* **11**: 616-622

999 Gibbons B. J., Brignole E. J., Azubel M., Murakami K., Voss N. R., Bushnell D. A.,  
1000 Asturias F. J., Kornberg R. D. (2012) Subunit architecture of general transcription  
1001 factor TFIIH. *Proc Natl Acad Sci USA* **109**: 1949-1954

1002 Giglia-Mari G., Coin F., Ranish J. A., Hoogstraten D., Theil A., Wijgers N., Jaspers N.  
1003 G. J., Raams A., Argentini M., van der Spek P. J. et al (2004) A new, tenth subunit of  
1004 TFIIH is responsible for the DNA repair syndrome trichothiodystrophy group A.  
1005 *Nat Genet* **36**: 714-719

1006 Greber B. J., Nguyen T. H. D., Fang J., Afonine P. V., Adams P. D., Nogales E. (2017)  
1007 The cryo-electron microscopy structure of human transcription factor IIH.  
1008 *Nature* **549**: 414-417

1009 Grünberg S., Warfield L., Hahn S. (2012) Architecture of the RNA polymerase II  
1010 preinitiation complex and mechanism of ATP-dependent promoter opening. *Nat*  
1011 *Struct Mol Biol* **19**: 788-796

1012 Guzder S. N., Qiu H., Sommers C. H., Sung P., Prakash L., Prakash S. (1994) DNA  
1013 repair gene RAD3 of *S. cerevisiae* is essential for transcription by RNA  
1014 polymerase II. *Nature* **367**: 91-94

1015 He Y., Fang J., Taatjes D. J., Nogales E. (2013) Structural visualization of key steps  
1016 in human transcription initiation. *Nature* **495**: 481-486

1017 He Y., Yan C., Fang J., Inouye C., Tjian R., Ivanov I., Nogales E. (2016) Near-atomic  
1018 resolution visualization of human transcription promoter opening. *Nature* **533**:  
1019 359-365

1020 Headd J. J., Echols N., Afonine P. V., Grosse-Kunstleve R. W., Chen V. B., Moriarty  
1021 N. W., Richardson D. C., Richardson J. S., Adams P. D. (2012) Use of knowledge-  
1022 based restraints in phenix.refine to improve macromolecular refinement at low  
1023 resolution. *Acta Crystallogr D Biol Crystallogr* **68**: 381-390

1024 Herrera-Moyano E., Moriel-Carretero M., Montelone B. A., Aguilera A. (2014) The  
1025 rem mutations in the ATP-binding groove of the Rad3/XPD helicase lead to  
1026 Xeroderma pigmentosum-Cockayne syndrome-like phenotypes. *PLoS Genet* **10**:  
1027 e1004859

1028 Hilario E., Li Y., Nobumori Y., Liu X., Fan L. (2013) Structure of the C-terminal half  
1029 of human XPB helicase and the impact of the disease-causing mutation XP11BE.  
1030 *Acta Crystallogr D Biol Crystallogr* **69**: 237-246

1031 Huang J. C., Svoboda D. L., Reardon J. T., Sancar A. (1992) Human nucleotide  
1032 excision nuclease removes thymine dimers from DNA by incising the 22nd



- 1033 phosphodiester bond 5' and the 6th phosphodiester bond 3' to the photodimer.  
1034 *Proc Natl Acad Sci USA* **89**: 3664-3668
- 1035 Jawhari A., Boussert S., Lamour V., Atkinson R. A., Kieffer B., Poch O., Potier N.,  
1036 Van Dorsselaer A., Moras D., Poterszman A. (2004) Domain architecture of the  
1037 p62 subunit from the human transcription/repair factor TFIIH deduced by  
1038 limited proteolysis and mass spectrometry analysis. *Biochemistry* **43**: 14420-  
1039 14430
- 1040 Jawhari A., Lainé J.-P., Dubaele S., Lamour V., Poterszman A., Coin F., Moras D.,  
1041 Egly J.-M. (2002) p52 Mediates XPB function within the transcription/repair  
1042 factor TFIIH. *J Biol Chem* **277**: 31761-31767
- 1043 Jones T. A., Zou J. Y., Cowan S. W., Kjeldgaard M. (1991) Improved methods for  
1044 building protein models in electron density maps and the location of errors in  
1045 these models. *Acta Crystallogr A Found Crystallogr* **47 (Pt. 2)**: 110-119
- 1046 Kainov D. E., Vitorino M., Cavarelli J., Poterszman A., Egly J.-M. (2008) Structural  
1047 basis for group A trichothiodystrophy. *Nat Struct Mol Biol* **15**: 980-984
- 1048 Kelley L. A., Mezulis S., Yates C. M., Wass M. N., Sternberg M. J. E. (2015) The  
1049 Phyre2 web portal for protein modeling, prediction and analysis. *Nat Protoc* **10**:  
1050 845-858
- 1051 Khoshouei M., Radjainia M., Baumeister W., Danev R. (2017) Cryo-EM structure  
1052 of haemoglobin at 3.2 Å determined with the Volta phase plate. *Nat Commun* **8**:  
1053 16099
- 1054 Kim J. S., Saint-André C., Lim H. S., Hwang C.-S., Egly J.-M., Cho Y. (2015) Crystal  
1055 structure of the Rad3/XPD regulatory domain of Ssl1/p44. *J Biol Chem* **290**:  
1056 8321-8330
- 1057 Kimanius D., Forsberg B. O., Scheres S. H., Lindahl E. (2016) Accelerated cryo-EM  
1058 structure determination with parallelisation using GPUs in RELION-2. *Elife* **5**:  
1059 e18722
- 1060 Kralund H. H., Ousager L., Jaspers N. G., Raams A., Pedersen E. B., Gade E., Bygum  
1061 A. (2013) Xeroderma Pigmentosum-Trichothiodystrophy overlap patient with  
1062 novel XPD/ERCC2 mutation. *Rare Dis* **1**: e24932
- 1063 Krissinel E., Henrick K. (2007) Inference of macromolecular assemblies from  
1064 crystalline state. *J Mol Biol* **372**: 774-797
- 1065 Kuper J., Braun C., Elias A., Michels G., Sauer F., Schmitt D. R., Poterszman A., Egly  
1066 J.-M., Kisker C. (2014) In TFIIH, XPD helicase is exclusively devoted to DNA  
1067 repair. *PLoS Biol* **12**: e1001954
- 1068 Kuper J., Wolski S. C., Michels G., Kisker C. (2012) Functional and structural  
1069 studies of the nucleotide excision repair helicase XPD suggest a polarity for DNA  
1070 translocation. *EMBO J* **31**: 494-502

1071 Lafrance-Vanasse J., Arseneault G., Cappadocia L., Legault P., Omichinski J. G.  
1072 (2013) Structural and functional evidence that Rad4 competes with Rad2 for  
1073 binding to the Tfb1 subunit of TFIIH in NER. *Nucleic Acids Res* **41**: 2736-2745

1074 Li C.-L., Golebiowski F. M., Onishi Y., Samara N. L., Sugawara K., Yang W. (2015)  
1075 Tripartite DNA Lesion Recognition and Verification by XPC, TFIIH, and XPA in  
1076 Nucleotide Excision Repair. *Mol Cell* **59**: 1025-1034

1077 Liu H., Rudolf J., Johnson K. A., McMahon S. A., Oke M., Carter L., McRobbie A.-M.,  
1078 Brown S. E., Naismith J. H., White M. F. (2008) Structure of the DNA Repair  
1079 Helicase XPD. *Cell* **133**: 801-812

1080 Liu J., Huang C., Shin D.-H., Yokota H., Jancarik J., Kim J.-S., Adams P. D., Kim R.,  
1081 Kim S.-H. (2005) Crystal structure of a heat-inducible transcriptional repressor  
1082 HrcA from *Thermotoga maritima*: structural insight into DNA binding and  
1083 dimerization. *J Mol Biol* **350**: 987-996

1084 Luo J., Cimermančič P., Viswanath S., Ebmeier C. C., Kim B., Dehecq M., Raman V.,  
1085 Greenberg C. H., Pellarin R., Sali A. et al (2015) Architecture of the Human and  
1086 Yeast General Transcription and DNA Repair Factor TFIIH. *Mol Cell* **59**: 794-806

1087 Mason A. C., Rambo R. P., Greer B., Pritchett M., Tainer J. A., Cortez D., Eichman B.  
1088 F. (2014) A structure-specific nucleic acid-binding domain conserved among  
1089 DNA repair proteins. *Proc Natl Acad Sci USA* **111**: 7618-7623

1090 Mathieu N., Kaczmarek N., Rüthemann P., Luch A., Naegeli H. (2013) DNA quality  
1091 control by a lesion sensor pocket of the xeroderma pigmentosum group D  
1092 helicase subunit of TFIIH. *Curr Biol* **23**: 204-212

1093 Mlak R., Krawczyk P., Homa-Mlak I., Powrózek T., Ciesielka M., Koziół P.,  
1094 Milanowski J., Małacka-Massalska T. (2018) Predictive Value of Single Nucleotide  
1095 Polymorphisms of ERCC1, XPA, XPC, XPD and XPG Genes, Involved in NER  
1096 Mechanism in Patients with Advanced NSCLC Treated with Cisplatin and  
1097 Gemcitabine. *Pathol Oncol Res*: 1-11

1098 Moriel-Carretero M., Aguilera A. (2010) A postincision-deficient TFIIH causes  
1099 replication fork breakage and uncovers alternative Rad51- or Pol32-mediated  
1100 restart mechanisms. *Mol Cell* **37**: 690-701

1101 Moriel-Carretero M., Herrera-Moyano E., Aguilera A. (2015) A unified model for  
1102 the molecular basis of Xeroderma pigmentosum-Cockayne Syndrome. *Rare Dis* **3**:  
1103 e1079362

1104 Murakami K., Tsai K.-L., Kalisman N., Bushnell D. A., Asturias F. J., Kornberg R. D.  
1105 (2015) Structure of an RNA polymerase II preinitiation complex. *Proc Natl Acad*  
1106 *Sci USA* **112**: 13543-13548

1107 Naegeli H., Bardwell L., Friedberg E. C. (1993) Inhibition of Rad3 DNA helicase  
1108 activity by DNA adducts and abasic sites: implications for the role of a DNA  
1109 helicase in damage-specific incision of DNA. *Biochemistry* **32**: 613-621



1110 Nakane T., Kimanius D., Lindahl E., Scheres S. H. (2018) Characterisation of  
1111 molecular motions in cryo-EM single-particle data by multi-body refinement in  
1112 RELION. *Elife* **7**: e36861

1113 Nguyen T. H. D., Galej W. P., Bai X.-C., Oubridge C., Newman A. J., Scheres S. H. W.,  
1114 Nagai K. (2016) Cryo-EM structure of the yeast U4/U6.U5 tri-snRNP at 3.7 Å  
1115 resolution. *Nature* **530**: 298-302

1116 Nguyen T. H. D., Galej W. P., Bai X.-C., Savva C. G., Newman A. J., Scheres S. H. W.,  
1117 Nagai K. (2015) The architecture of the spliceosomal U4/U6.U5 tri-snRNP.  
1118 *Nature* **523**: 47-52

1119 Obmolova G., Ban C., Hsieh P., Yang W. (2000) Crystal structures of mismatch  
1120 repair protein MutS and its complex with a substrate DNA. *Nature* **407**: 703-710

1121 Oksenych V., Bernardes de Jesus B., Zhovmer A., Egly J.-M., Coin F. (2009)  
1122 Molecular insights into the recruitment of TFIIH to sites of DNA damage. *EMBO J*  
1123 **28**: 2971-2980

1124 Okuda M., Nakazawa Y., Guo C., Ogi T., Nishimura Y. (2017) Common TFIIH  
1125 recruitment mechanism in global genome and transcription-coupled repair  
1126 subpathways. *Nucleic Acids Res* **45**: 13043-13055

1127 Peters G. J., Avan A., Ruiz M. G., Orsini V., Avan A., Giovannetti E., Smit E. F. (2014)  
1128 Predictive role of repair enzymes in the efficacy of Cisplatin combinations in  
1129 pancreatic and lung cancer. *Anticancer Res* **34**: 435-442

1130 Pettersen E. F., Goddard T. D., Huang C. C., Couch G. S., Greenblatt D. M., Meng E.  
1131 C., Ferrin T. E. (2004) UCSF Chimera--a visualization system for exploratory  
1132 research and analysis. *J Comput Chem* **25**: 1605-1612

1133 Poterszman A., Lamour V., Egly J. M., Moras D., Thierry J. C., Poch O. (1997) A  
1134 eukaryotic XPB/ERCC3-like helicase in Mycobacterium leprae? *Trends Biochem*  
1135 *Sci* **22**: 418-419

1136 Radu L., Schoenwetter E., Braun C., Marcoux J., Koelmel W., Schmitt D. R., Kuper J.,  
1137 Cianférani S., Egly J. M., Poterszman A. et al (2017) The intricate network  
1138 between the p34 and p44 subunits is central to the activity of the  
1139 transcription/DNA repair factor TFIIH. *Nucleic Acids Res* **45**: 10872-10883

1140 Rapin I. (2013) Disorders of nucleotide excision repair. *Handb Clin Neurol* **113**:  
1141 1637-1650

1142 Riou L., Zeng L., Chevallier-Lagente O., Stary A., Nikaido O., Taïeb A., Weeda G.,  
1143 Mezzina M., Sarasin A. (1999) The relative expression of mutated XPB genes  
1144 results in xeroderma pigmentosum/Cockayne's syndrome or  
1145 trichothiodystrophy cellular phenotypes. *Hum Mol Genet* **8**: 1125-1133

1146 Robert X., Gouet P. (2014) Deciphering key features in protein structures with  
1147 the new ENDscript server. *Nucleic Acids Res* **42**: W320-324

- 1148 Robinson P. J., Trnka M. J., Bushnell D. A., Davis R. E., Mattei P.-J., Burlingame A. L.,  
1149 Kornberg R. D. (2016) Structure of a Complete Mediator-RNA Polymerase II Pre-  
1150 Initiation Complex. *Cell* **166**: 1411-1422.e1416
- 1151 Rosenthal P. B., Henderson R. (2003) Optimal determination of particle  
1152 orientation, absolute hand, and contrast loss in single-particle electron  
1153 cryomicroscopy. *J Mol Biol* **333**: 721-745
- 1154 Rossignol M., Kolb-Cheynel I., Egly J. M. (1997) Substrate specificity of the cdk-  
1155 activating kinase (CAK) is altered upon association with TFIIH. *EMBO J* **16**: 1628-  
1156 1637
- 1157 Rouillon C., White M. F. (2010) The XBP-Bax1 helicase-nuclease complex  
1158 unwinds and cleaves DNA: implications for eukaryal and archaeal nucleotide  
1159 excision repair. *J Biol Chem* **285**: 11013-11022
- 1160 Rudolf J., Makrantonis V., Ingledew W. J., Stark M. J. R., White M. F. (2006) The  
1161 DNA repair helicases XPD and FancJ have essential iron-sulfur domains. *Mol Cell*  
1162 **23**: 801-808
- 1163 Sainsbury S., Bernecky C., Cramer P. (2015) Structural basis of transcription  
1164 initiation by RNA polymerase II. *Nat Rev Mol Cell Biol* **16**: 129-143
- 1165 Sandrock B., Egly J. M. (2001) A yeast four-hybrid system identifies Cdk-  
1166 activating kinase as a regulator of the XPD helicase, a subunit of transcription  
1167 factor IIH. *J Biol Chem* **276**: 35328-35333
- 1168 Scheres S. H. W. (2010) Classification of Structural Heterogeneity by Maximum-  
1169 Likelihood Methods. *Meth Enz* **482**: 295-320
- 1170 Scheres S. H. W. (2012) RELION: implementation of a Bayesian approach to cryo-  
1171 EM structure determination. *J Struct Biol* **180**: 519-530
- 1172 Scheres S. H. W. (2015) Semi-automated selection of cryo-EM particles in  
1173 RELION-1.3. *J Struct Biol* **189**: 114-122
- 1174 Scheres S. H. W., Chen S. (2012) Prevention of overfitting in cryo-EM structure  
1175 determination. *Nat Meth* **9**: 853-854
- 1176 Schilbach S., Hantsche M., Tegunov D., Dienemann C., Wigge C., Urlaub H., Cramer  
1177 P. (2017) Structures of transcription pre-initiation complex with TFIIH and  
1178 Mediator. *Nature* **551**: 204-209
- 1179 Seroz T., Perez C., Bergmann E., Bradsher J., Egly J. M. (2000) p44/SSL1, the  
1180 regulatory subunit of the XPD/RAD3 helicase, plays a crucial role in the  
1181 transcriptional activity of TFIIH. *J Biol Chem* **275**: 33260-33266
- 1182 Shiekhhattar R., Mermelstein F., Fisher R. P., Drapkin R., Dynlacht B., Wessling H.  
1183 C., Morgan D. O., Reinberg D. (1995) Cdk-activating kinase complex is a  
1184 component of human transcription factor TFIIH. *Nature* **374**: 283-287

1185 Sugasawa K., Akagi J.-i., Nishi R., Iwai S., Hanaoka F. (2009) Two-step recognition  
1186 of DNA damage for mammalian nucleotide excision repair: Directional binding of  
1187 the XPC complex and DNA strand scanning. *Mol Cell* **36**: 642-653

1188 Sugitani N., Sivley R. M., Perry K. E., Capra J. A., Chazin W. J. (2016) XPA: A key  
1189 scaffold for human nucleotide excision repair. *DNA Repair (Amst)* **44**: 123-135

1190 Svejstrup J. Q., Wang Z., Feaver W. J., Wu X., Bushnell D. A., Donahue T. F.,  
1191 Friedberg E. C., Kornberg R. D. (1995) Different forms of TFIIH for transcription  
1192 and DNA repair: holo-TFIIH and a nucleotide excision repairosome. *Cell* **80**: 21-  
1193 28

1194 Theron T., Foustier M. I., Volker M., Harries L. W., Botta E., Stefanini M., Fujimoto  
1195 M., Andressoo J.-O., Mitchell J., Jaspers N. G. J. et al (2005) Transcription-  
1196 associated breaks in xeroderma pigmentosum group D cells from patients with  
1197 combined features of xeroderma pigmentosum and Cockayne syndrome. *Mol Cell*  
1198 *Biol* **25**: 8368-8378

1199 Tirode F., Busso D., Coin F., Egly J. M. (1999) Reconstitution of the transcription  
1200 factor TFIIH: assignment of functions for the three enzymatic subunits, XPB, XPD,  
1201 and cdk7. *Mol Cell* **3**: 87-95

1202 Tremeau-Bravard A., Perez C., Egly J. M. (2001) A role of the C-terminal part of  
1203 p44 in the promoter escape activity of transcription factor IIH. *J Biol Chem* **276**:  
1204 27693-27697

1205 Tsai K.-L., Yu X., Gopalan S., Chao T.-C., Zhang Y., Florens L., Washburn M. P.,  
1206 Murakami K., Conaway R. C., Conaway J. W. et al (2017) Mediator structure and  
1207 rearrangements required for holoenzyme formation. *Nature Publishing Group*: 1-  
1208 19

1209 Vermeulen W., Rademakers S., Jaspers N. G., Appeldoorn E., Raams A., Klein B.,  
1210 Kleijer W. J., Hansen L. K., Hoeijmakers J. H. (2001) A temperature-sensitive  
1211 disorder in basal transcription and DNA repair in humans. *Nat Genet* **27**: 299-  
1212 303

1213 Vitorino M., Coin F., Zlobinskaya O., Atkinson R. A., Moras D., Egly J.-M.,  
1214 Poterszman A., Kieffer B. (2007) Solution structure and self-association  
1215 properties of the p8 TFIIH subunit responsible for trichothiodystrophy. *J Mol Biol*  
1216 **368**: 473-480

1217 Warfield L., Luo J., Ranish J., Hahn S. (2016) Function of conserved topological  
1218 regions within the *S. cerevisiae* basal transcription factor TFIIH. *Mol Cell Biol* **36**:  
1219 2464-2475

1220 Winkler G. S., Araújo S. J., Fiedler U., Vermeulen W., Coin F., Egly J. M.,  
1221 Hoeijmakers J. H., Wood R. D., Timmers H. T., Weeda G. (2000) TFIIH with  
1222 inactive XPD helicase functions in transcription initiation but is defective in DNA  
1223 repair. *J Biol Chem* **275**: 4258-4266

1224 Wirth N., Gross J., Roth H. M., Buechner C. N., Kisker C., Tessmer I. (2016)  
1225 Conservation and Divergence in Nucleotide Excision Repair Lesion Recognition. *J*  
1226 *Biol Chem* **291**: 18932-18946

1227 Wolski S. C., Kuper J., Hänzelmann P., Truglio J. J., Croteau D. L., Van Houten B.,  
1228 Kisker C. (2008) Crystal structure of the FeS cluster-containing nucleotide  
1229 excision repair helicase XPD. *PLoS Biol* **6**: e149

1230 Zhang K. (2016) Gctf: Real-time CTF determination and correction. *J Struct Biol*  
1231 **193**: 1-12

1232 Zheng S. Q., Palovcak E., Armache J.-P., Verba K. A., Cheng Y., Agard D. A. (2017)  
1233 MotionCor2: anisotropic correction of beam-induced motion for improved cryo-  
1234 electron microscopy. *Nat Meth* **14**: 331-332

1235 Ziani S., Nagy Z., Alekseev S., Soutoglou E., Egly J.-M., Coin F. (2014) Sequential  
1236 and ordered assembly of a large DNA repair complex on undamaged chromatin. *J*  
1237 *Cell Biol* **206**: 589-598

1238 Zivanov J., Nakane T., Forsberg B. O., Kimanius D., Hagen W. J., Lindahl E., Scheres  
1239 S. H. (2018) New tools for automated high-resolution cryo-EM structure  
1240 determination in RELION-3. *Elife* **7**: e42166  
1241  
1242  
1243

## Figure supplements

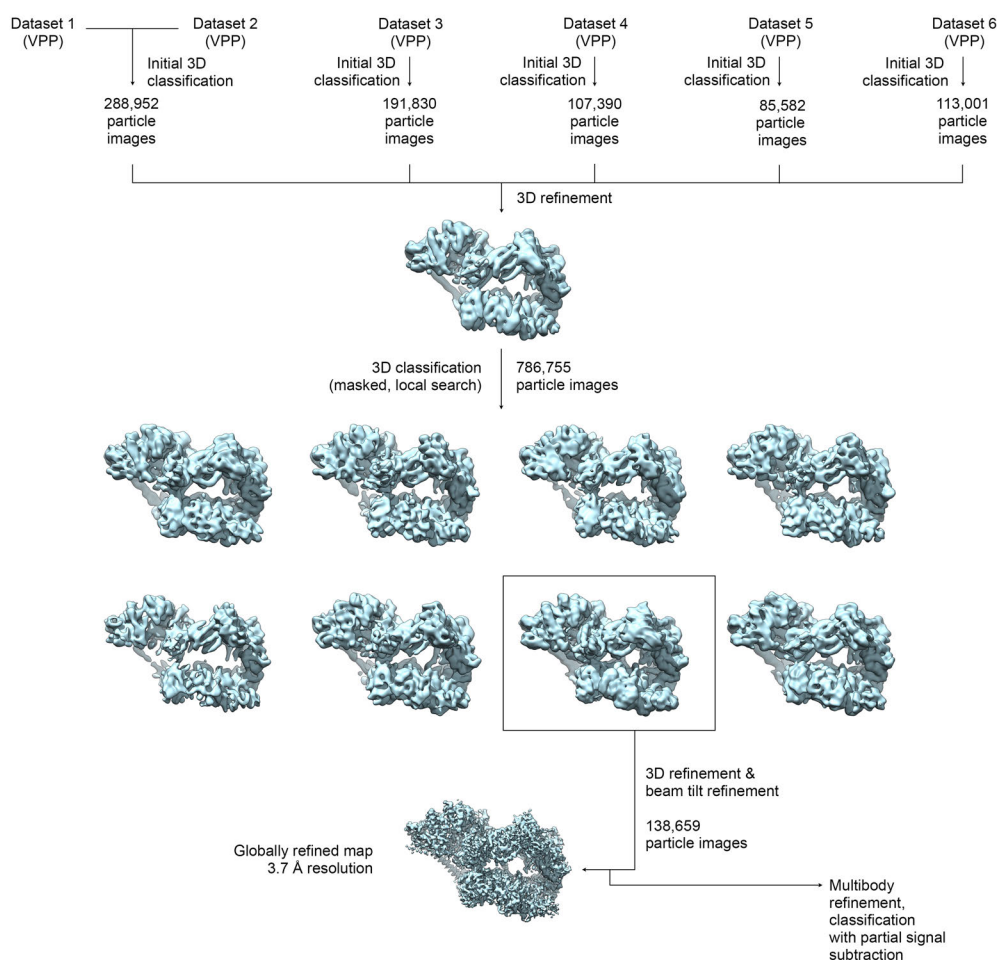

**Figure 1 - figure supplement 1. Data processing scheme for global reconstruction.** The datasets (DS) were initially processed individually, with the exception of DS6, where particles from DS4 were used to compensate for orientation bias, and DS1/DS2, which were joined for processing. Subsequently, the datasets were pooled and sub-classified. The best class of was used for the final refinement to obtain a globally refined map at 3.7 Å resolution (see Figure 1 – figure supplement 2). The classified VPP dataset was also used for further processing and classification of sub-regions (Figure 1 – figure supplements 3-5).



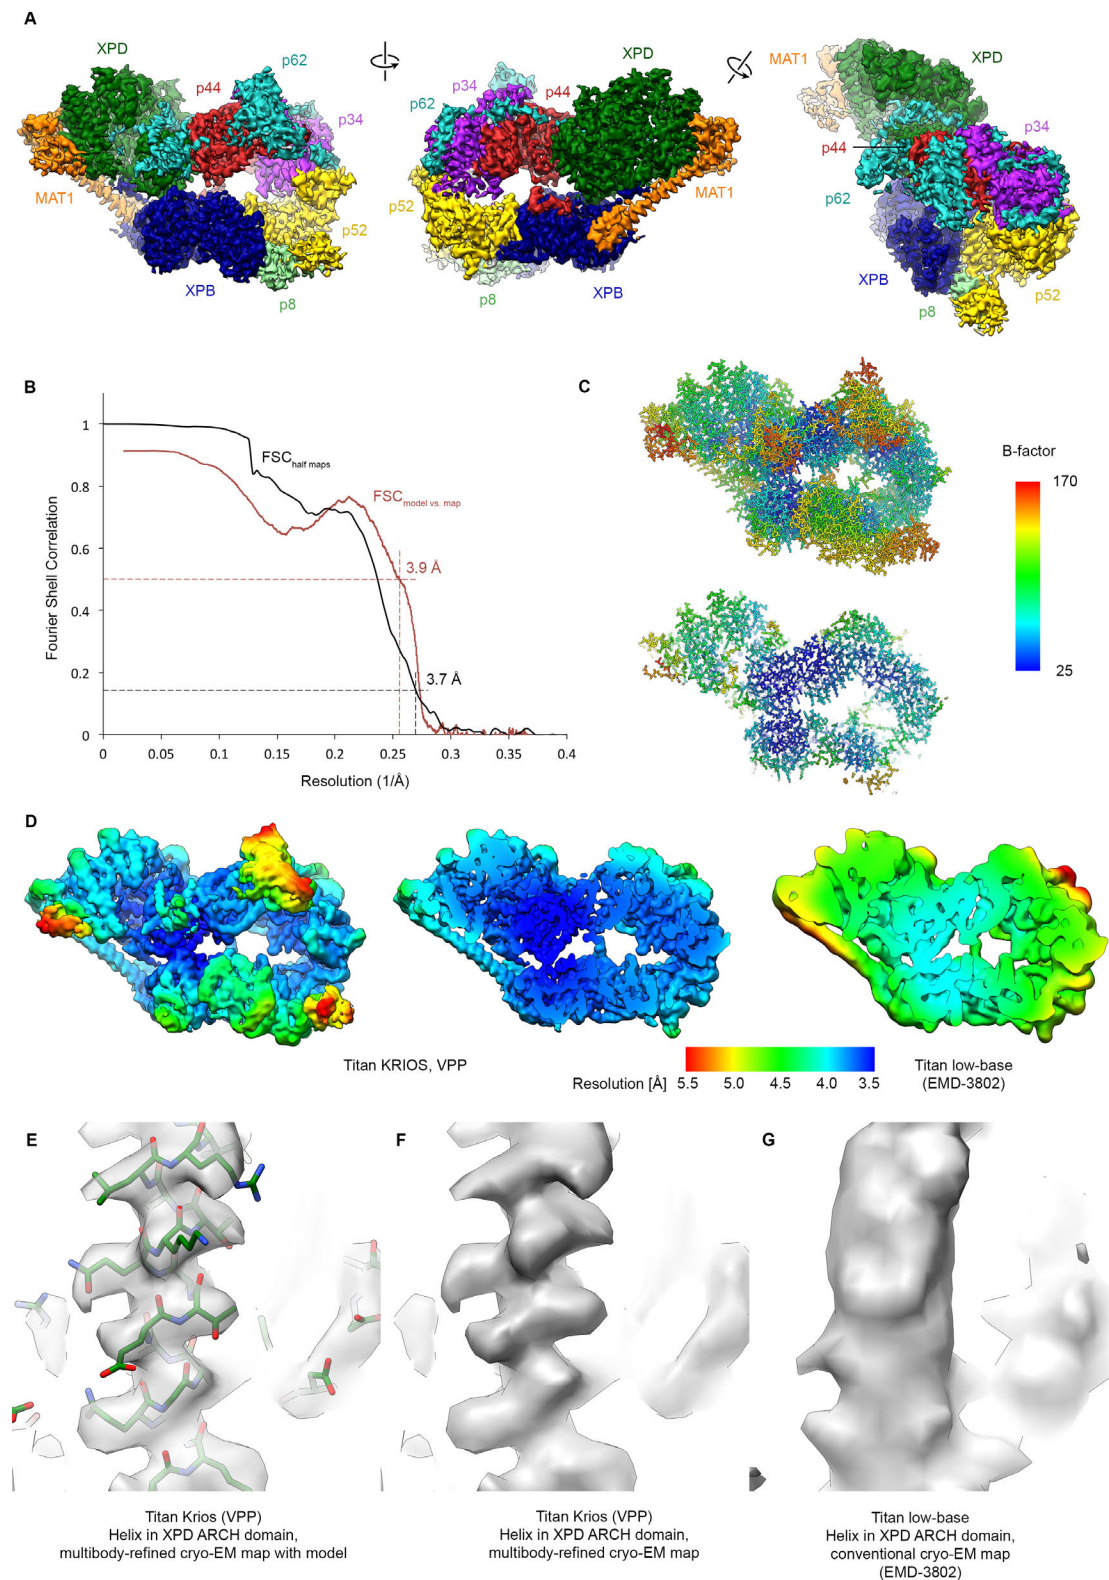

**Figure 1 – figure supplement 2. Resolution estimation, validation statistics, and quality of the density.** (A) Three views of the refined, sharpened, and low-pass filtered cryo-EM map of the TFIIH core complex. Protein subunits are color-coded and labeled. (B) Fourier shell correlation (FSC) curves. Black: FSC curve

between half-maps. Red: FSC curve between map and refined model. The resolution at the appropriate thresholds (Rosenthal & Henderson, 2003; Scheres & Chen, 2012) is indicated. (C) B-factor distribution on the refined TFIIDH coordinate model. (D) Local resolution estimation, computed by windowed FSC in RELION 2. (E, F, G) Comparison of the 3.6 Å multibody-refined cryo-EM map of the TFIIDH core complex (E, F) with our previous 4.4 Å cryo-EM map (G) shows substantial improvements in map quality in the more peripheral and flexible regions of the complex (an  $\alpha$ -helix from the XPD ARCH domain is shown).

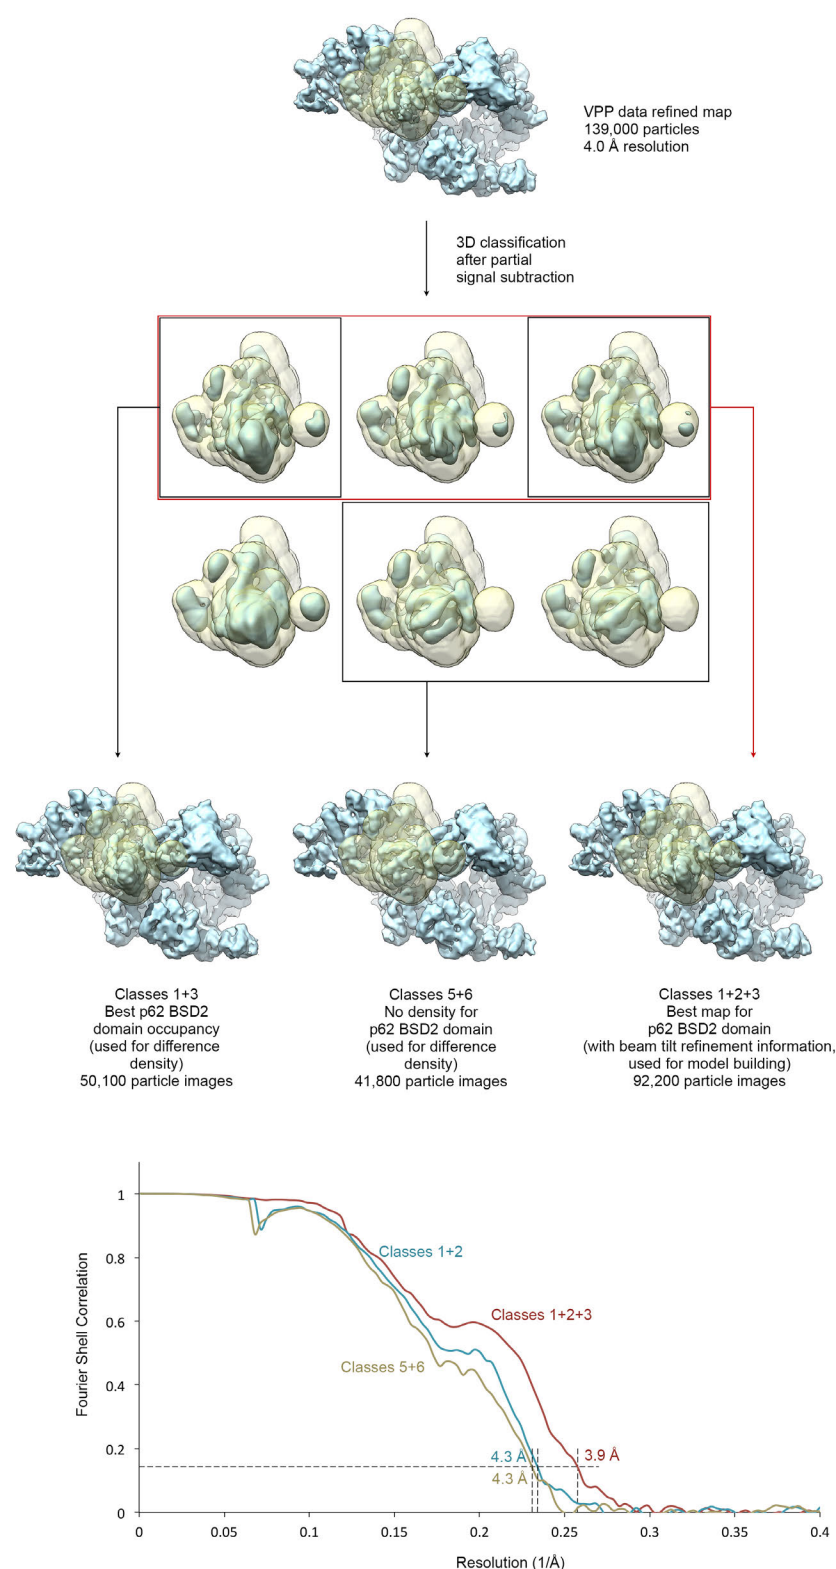

**Figure 1 – figure supplement 3. Focused classification of the p62 BSD2 domain.** (A) Focused classification for the p62 BSD2 domain and adjacent structural elements using the classified VPP dataset (indicated in Figure 1 –

figure supplement 1). Partial signal subtraction (Bai et al., 2015) and masking were used to focus the classification on the region of interest (mask shown in transparent yellow). Selected classes were refined using the selected but un-subtracted particle images because the region of interest is too small for efficient image alignment (Nguyen et al., 2016). **(B)** FSC curves for the three refined maps shown in (A), indicating resolution of 3.9-4.3 Å according to the FSC = 0.143 criterion (Rosenthal & Henderson, 2003).

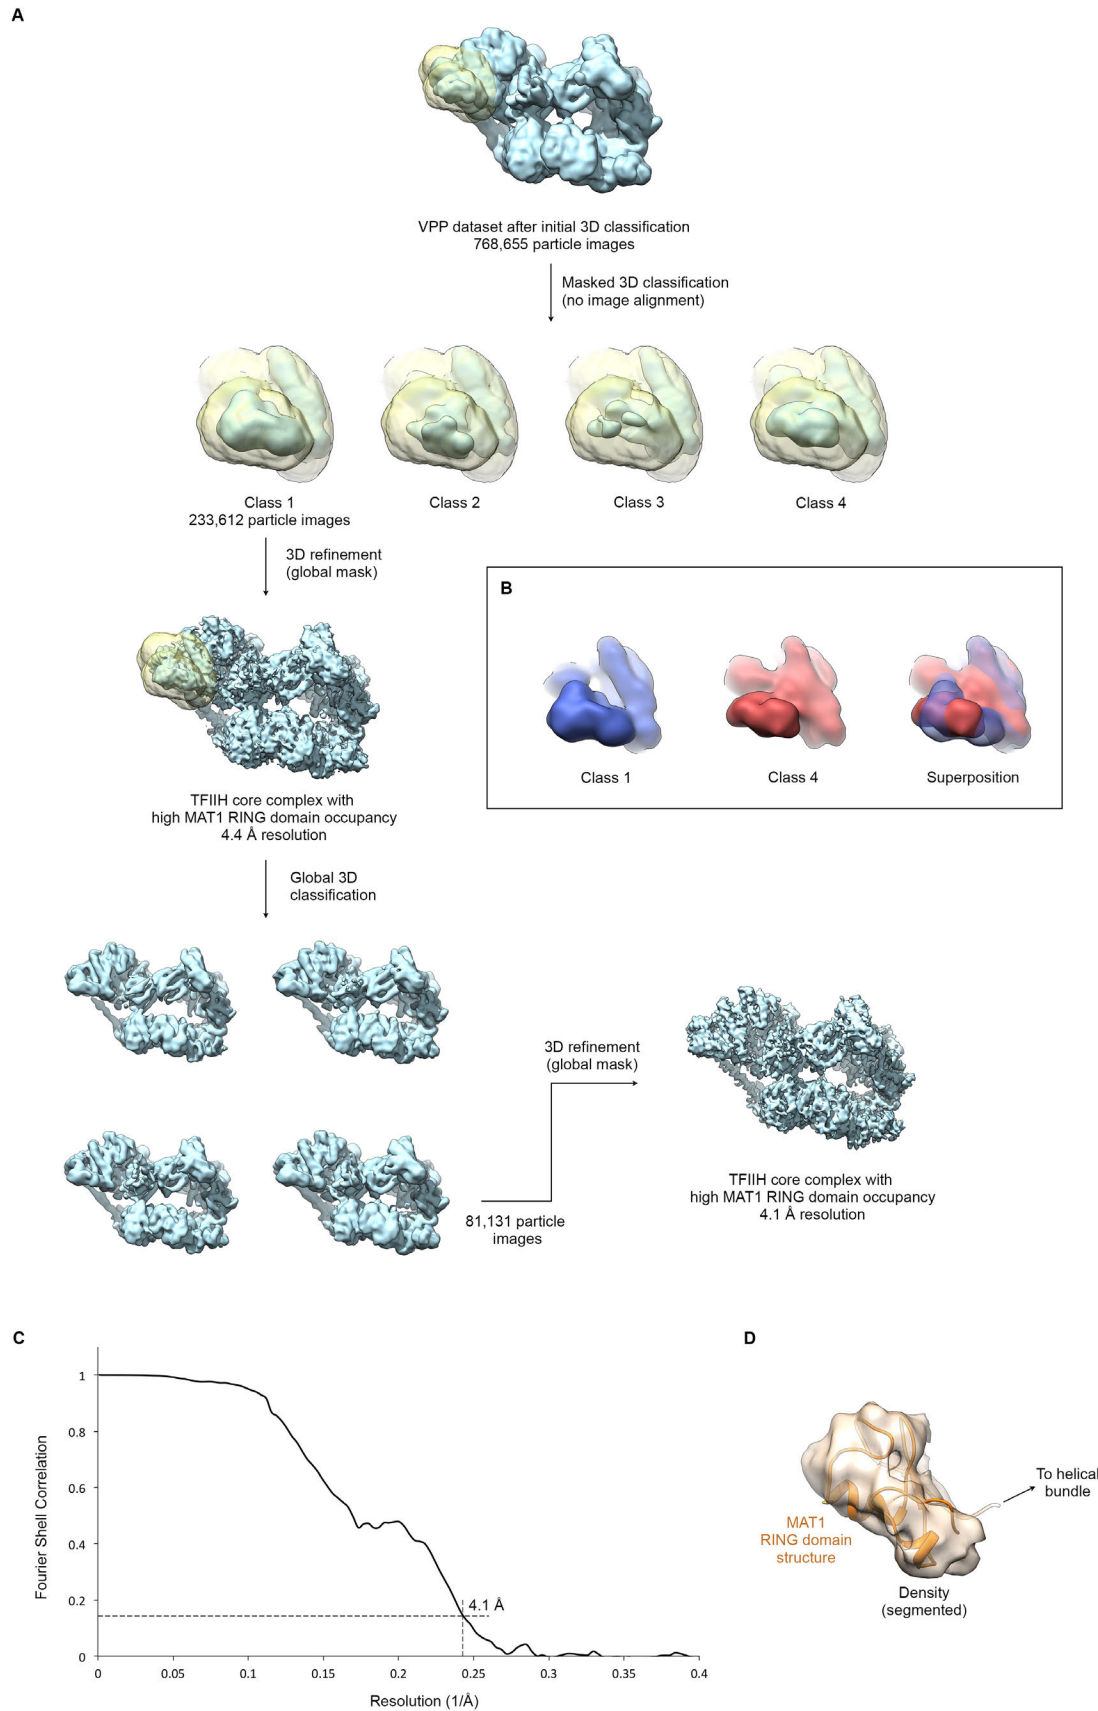

**Figure 1 – figure supplement 4. Focused classification and interpretation of the MAT1 RING domain density. (A) The entire pool of pre-classified TFIIH**



particles from the VPP datasets was subjected to alignment-free focused 3D classification using a mask that covers the MAT1 RING domain and helical bundle. Signal subtraction was not required due to the peripheral location of the region in the complex and the orientation distribution of the particle images. After one round of additional global classification (to select for overall particle quality and conformation), the class showing the most highly occupied density for the MAT1 RING domain was refined to 4.1 Å resolution (using beam tilt values imported from the best-resolution refinement, Figure 1 – figure supplement 1). **(B)** 3D classes differed not only in occupancy (i.e. classes 2 and 3 showed low occupancy and fragmented density for the MAT1 RING domain) but also in the orientation of the MAT1 RING domain, which is flexibly attached to the complex. Classes 1 and 4 are shown in different colors individually and superposed to highlight the different orientations of the MAT1 RING domain. **(C)** The FSC curve estimates a resolution of 4.1 Å for the refined map of TFIID with high occupancy of the MAT1 RING domain. **(D)** Best fit of the structure of the MAT1 RING domain (Gervais et al., 2001) into the cryo-EM map, obtained using the FITMAP command in UCSF CHIMERA (Pettersen et al., 2004) with 100 independent initial placements before local optimization at 5 Å resolution. This fit shows the best correlation between model and map and additionally satisfies geometrical constraints imposed by the continuity of the peptide chain between the RING domain and the MAT1 helical bundle.

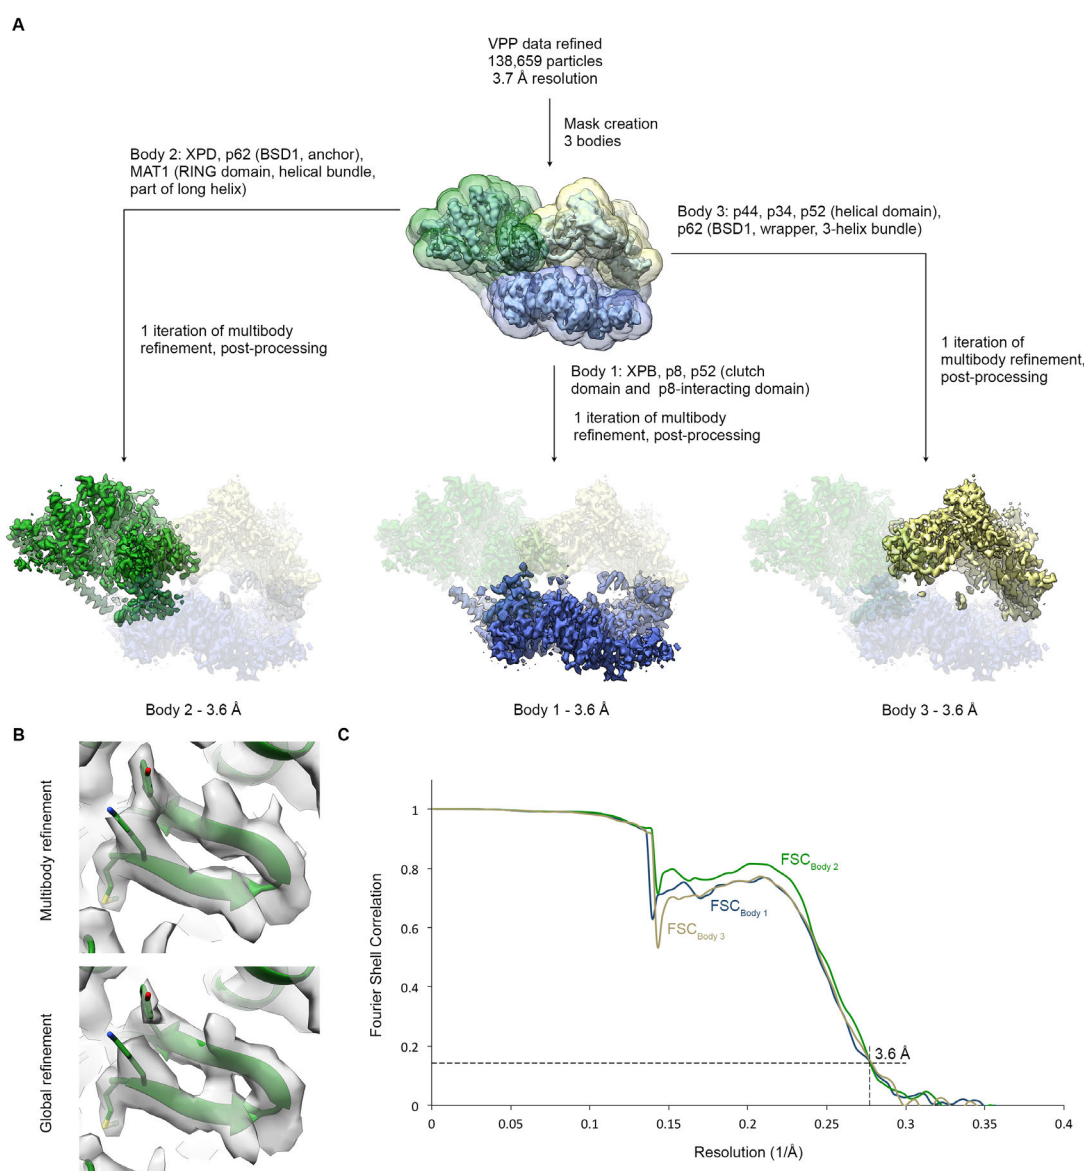

**Figure 1 – figure supplement 5. Multibody refinement.** (A) Schematic for multibody refinement (Nakane et al., 2018) of the classified VPP dataset (indicated in Figure 1 – figure supplement 1). Three bodies were used and subjected to multibody refinement using the corresponding masks. (B) Example of the improvement of the cryo-EM density for the XPD N-terminus after multibody refinement (top) relative to the global refinement (bottom). (C) FSC curves for the refined bodies, indicating resolutions of 3.6 Å according to the FSC = 0.143 criterion (Rosenthal & Henderson, 2003).

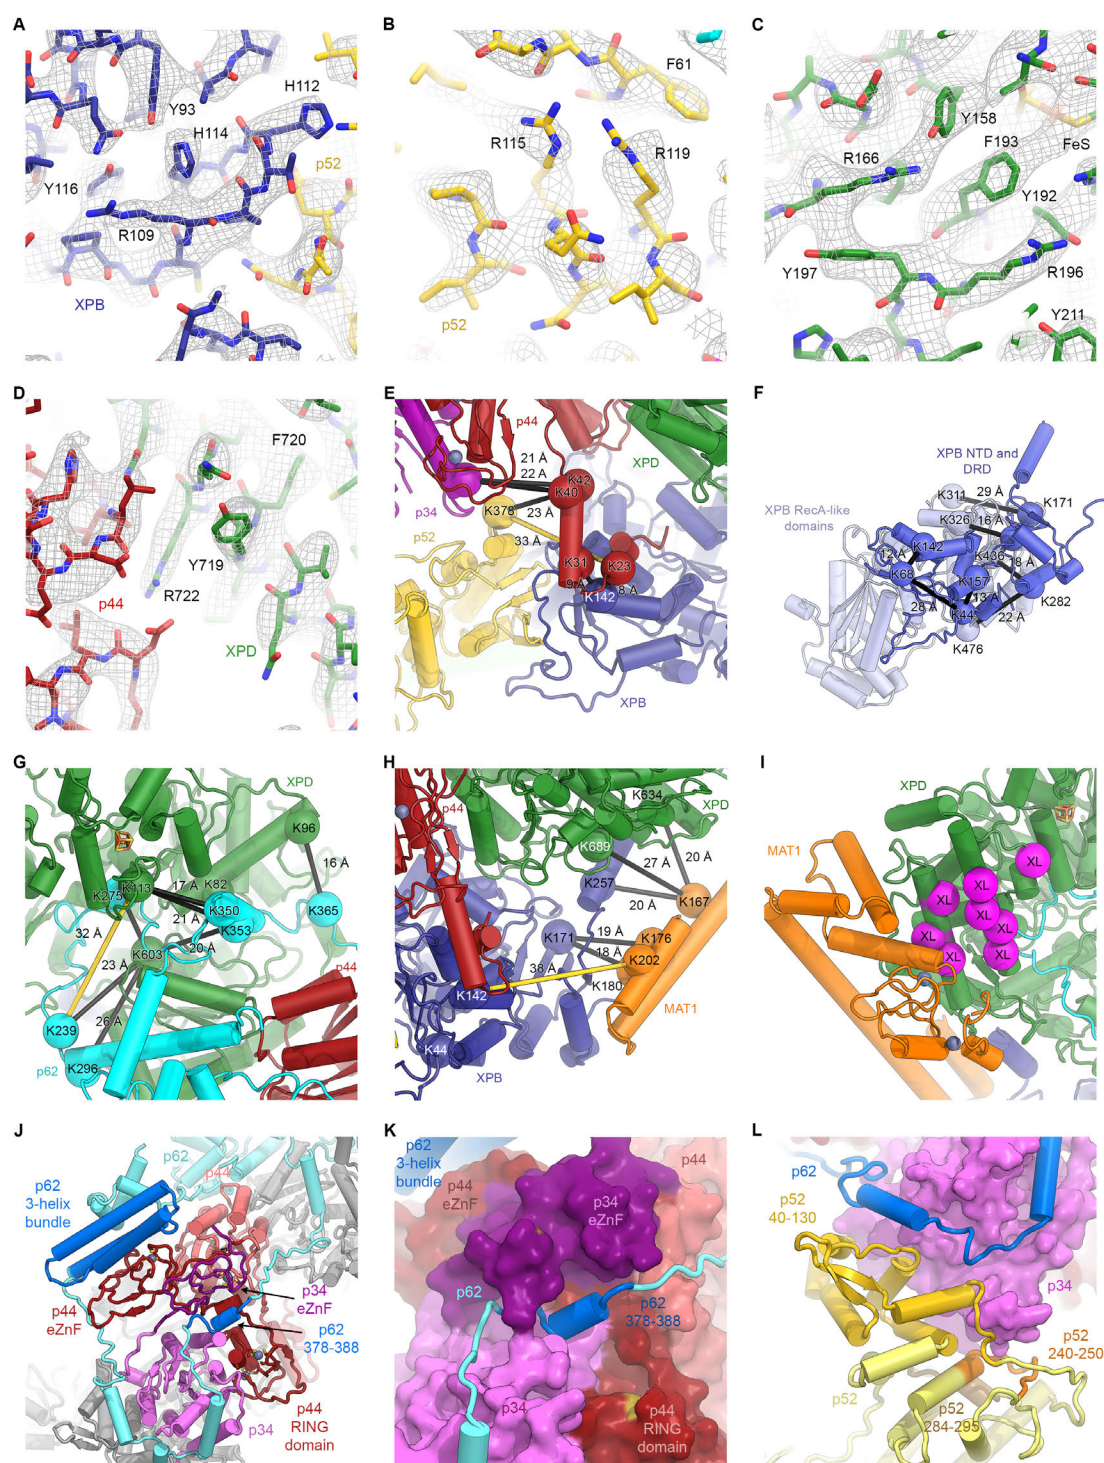

the p44 NTE towards the XPB NTD. **(F)** Intramolecular crosslinks in XPB validate the tracing of the XPB NTD. **(G)** Crosslinks between p62 and XPD. Crosslinks between p62 and p44 are not shown (see Methods and Supplementary Data Table 1). **(H)** Crosslinks between MAT1 and XPB and XPD. One strong outlier connecting XPB K44 to the MAT1 helical bundle ( $>100$  Å distance) is a likely false positive and is not shown. **(I)** Location of site-specific crosslinks between RAD3, the yeast XPD homolog (RAD3 residues carrying the crosslinker mapped onto the XPD structure and shown as purple spheres) and TFB3, the yeast MAT1 homolog (Warfield et al., 2016). **(J)** Interlocking zinc-binding domains of p44 and p34 mediate interactions between these proteins in the hinge region. The p62 C-terminal 3-helix bundle binds to the p44 eZnF domain. **(K)** Residues 378-388 of p62 are sandwiched between the zinc-binding domains of p34 and p44. **(L)** View of the p62-p52-p34 interaction region.



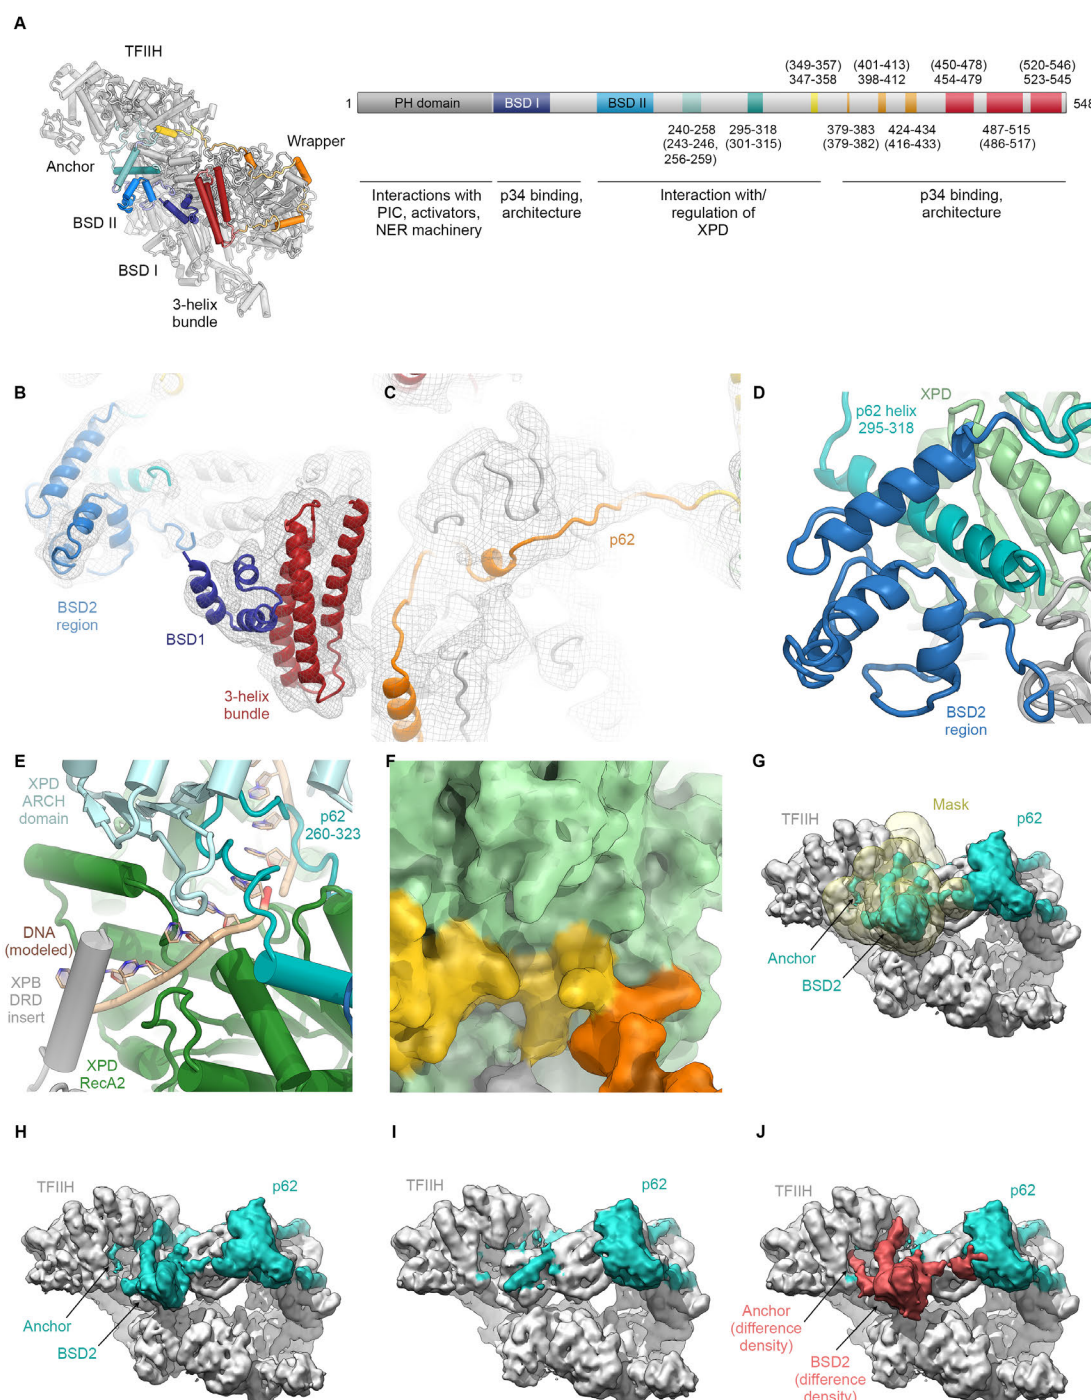

**Figure 2 – figure supplement 1. Analysis of the structure of p62.** (A) p62 architecture and sequence assignment. Fitting of domains (see B), secondary structure prediction for  $\alpha$ -helices (Kelley et al., 2015), helical segments of the cryo-EM map, and density for large side chains were used for initial assignment of the trace of p62. The final model shows good agreement of observed helical segments (residue numbers indicated) and secondary structure prediction for  $\alpha$ -



helices (residue numbers given in brackets). **(B)** Fitting of p62 BSD1 (PDB ID 2DII; blue) into the TFIIH cryo-EM map. Due to flexibility, the density in this region is weak and was low-pass filtered to 6 Å for interpretation and fitting. In agreement with previous results (Schilbach et al., 2017), this domain interacts with the p62 C-terminal three-helix bundle (purple), which in turn sits on the eZnF domain of p44 (Figure 1 – figure supplement 6J), thereby explaining the importance of the latter region for functional TFIIH (Tremeau-Bravard et al., 2001). **(C)** Extended segments of the p62 chain were interpreted using the low-pass filtered map as described in (B) to maintain continuity of the cryo-EM density. **(D)** The p62 helix 295-317 is sandwiched between the BSD2 region of p62 and XPD RecA2, thereby bridging these two elements of TFIIH. **(E)** XPD-bound DNA was modeled by domain-wise superposition of the structure of the substrate-bound helicase DinG (Cheng & Wigley, 2018) onto the RecA-like domains of XPD. The presence of the p62 anchor near XPD RecA2 leads to steric hindrance with the DNA that would prevent binding. **(F)** Residues 346-361 of p62 block access to the XPD nucleotide-binding pocket. **(G-J)** Analysis of p62 (teal) conformational dynamics. **(G)** Particle images were sorted for p62 elements near XPD using signal-subtracted focused classification (mask shown in yellow; see Figure 1 – figure supplement 3). **(H)** Refined class with p62 density near XPD. **(I)** Refined class without p62 density near XPD. **(J)** Difference density (red) between the densities shown in H, I. Both classes show intact particles, even in the absence of the p62 segment inserted into the XPD substrate binding cavity.

13

(*Saccharomyces cerevisiae*, Q00578), ciliate (*Paramecium tetraurelia*, XP\_001448651.1), plant (*Arabidopsis thaliana*, Q38861), archaea (*Ferroplasma*, EQB73227.1, *Thermoplasma*, EQB71900.1), bacteria (*Mycobacterium leprae*, Q9CBE0) (Balasingham et al., 2012; Poterszman et al., 1997). Some archaeal XPBs, including the *Archaeoglobus fulgidus* homolog that served for structure determination (Fan et al., 2006), contain only the DRD, lacking the NTD/NTE, and were not included. Residues are numbered according to the human sequence. Identical residues are printed white on red background, similar residues in red on white background. Secondary structure elements, residues mutated in human disease (F99S, T119S), and the approx. 70-residue insertion in the DRD are indicated. Figure generated using the ESPript web server (Robert & Gouet, 2014).

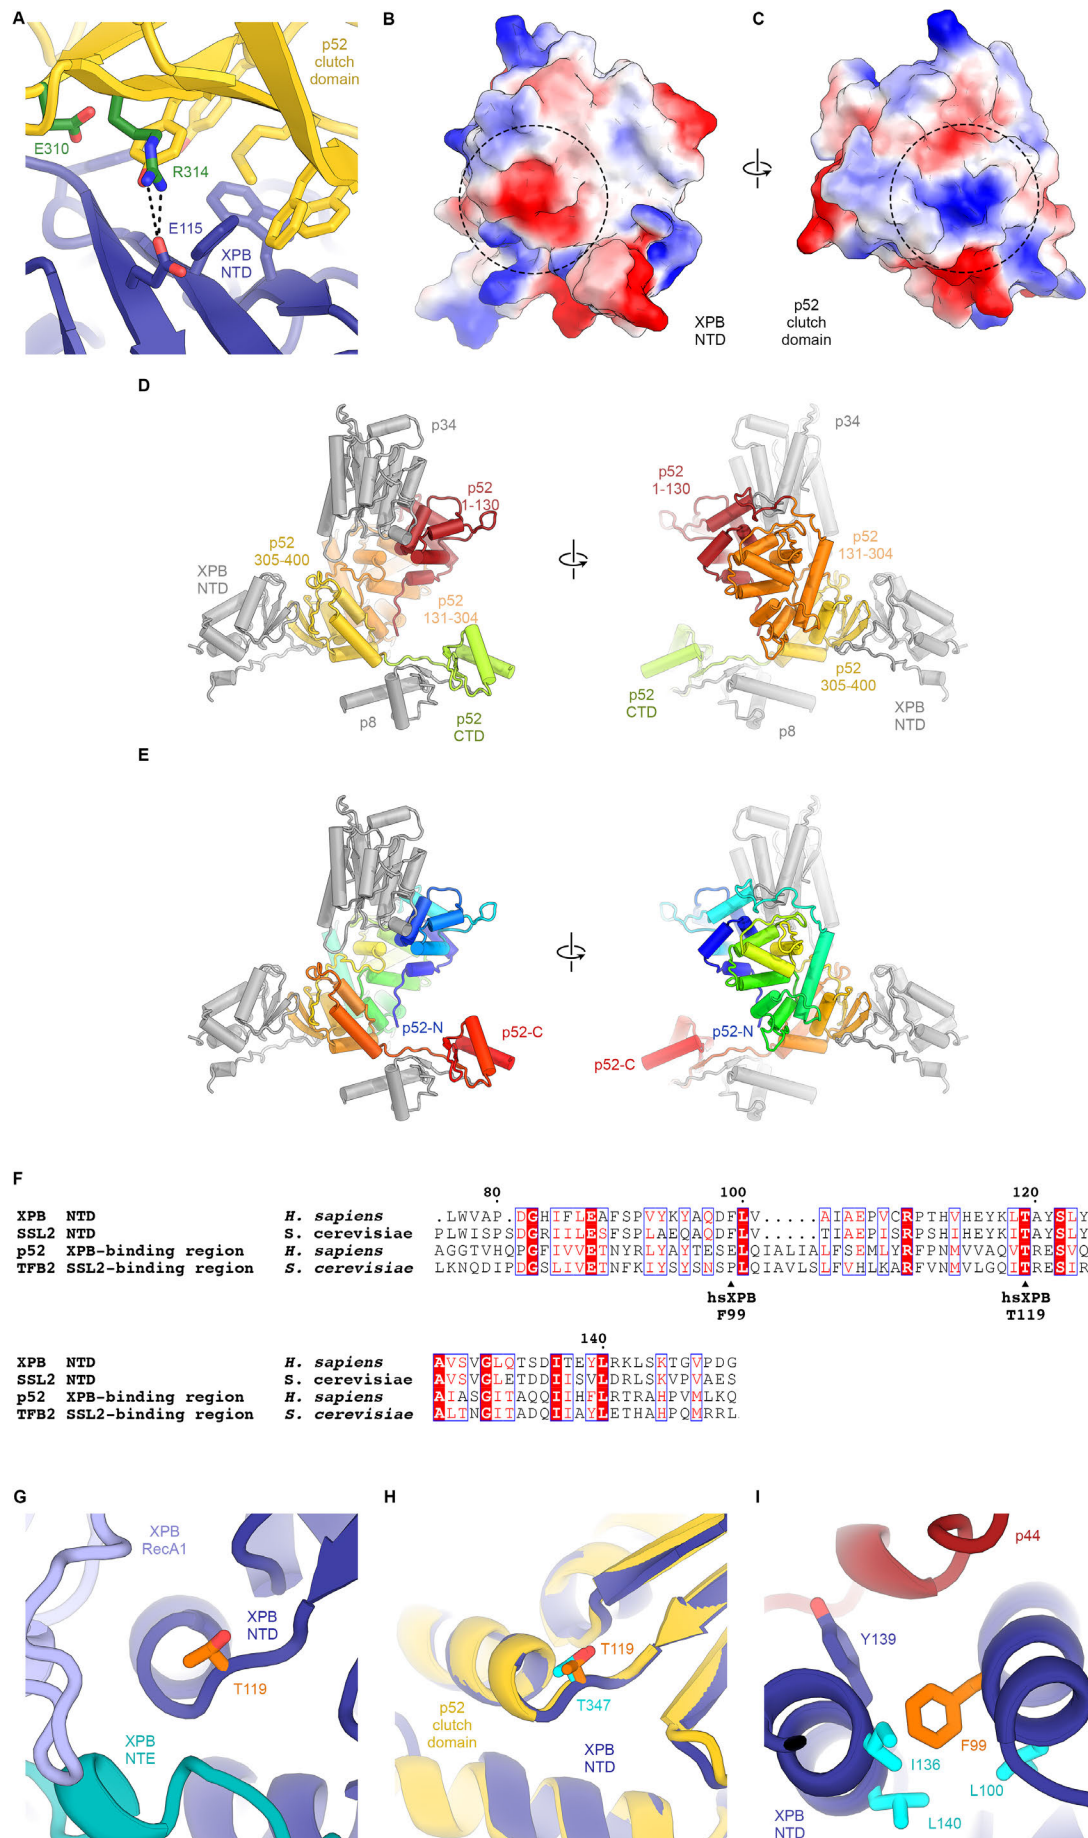



**Figure 3 – figure supplement 2. Structure and interactions of the XPB DRD and NTD.** (A) Interface between the XPB NTD and the p52-clutch domains. Contacts include several large hydrophobic residues, as well as a salt bridge between p52 R314 and XPB E115 (shown as sticks). Mutations of residues equivalent to R314 and E310 in *D. melanogaster* p52 lead to disease-like phenotypes (Fregoso et al., 2007). (B, C) Electrostatic surface potential of the interacting surfaces of the XPB NTD (B) and the p52 clutch domain (C) show charge complementarity (strongest complementary charge peak indicated by a circle). (D) Front and back views of the domain organization of p52. Residues 1-130 (red) and 131-304 (orange) are not in contact with the XPB NTD. Residues 304-400 of p52 form the p52 clutch. Protein subunits or domains interacting with p52 are shown in grey. (E) Same as D, but p52 is colored using a gradient from blue (N-terminus) to red (C-terminus). (F) Sequence alignment of human and yeast p52 clutch and XPB NT domains highlights several highly conserved residues, including XPB T119, which is affected by a human disease mutation. Generated using the ESPript web server (Robert & Gouet, 2014). (G) Location of XPB T119, affected by the TTD mutation T119P, at a junction between a  $\beta$ -strand and an  $\alpha$ -helix near the interface between XPB NTD, NTE, and RecA1 domains. (H) Superposition of the XPB NTD and the p52 clutch shows that a threonine at the position of XPB T119 also occurs in the p52 clutch. (I) The XP/CS mutation F99S affects a XPB NTD residue (orange) situated in a hydrophobic pocket formed by aliphatic residues (cyan) that are conserved across yeast and human XPB and p52 (F).



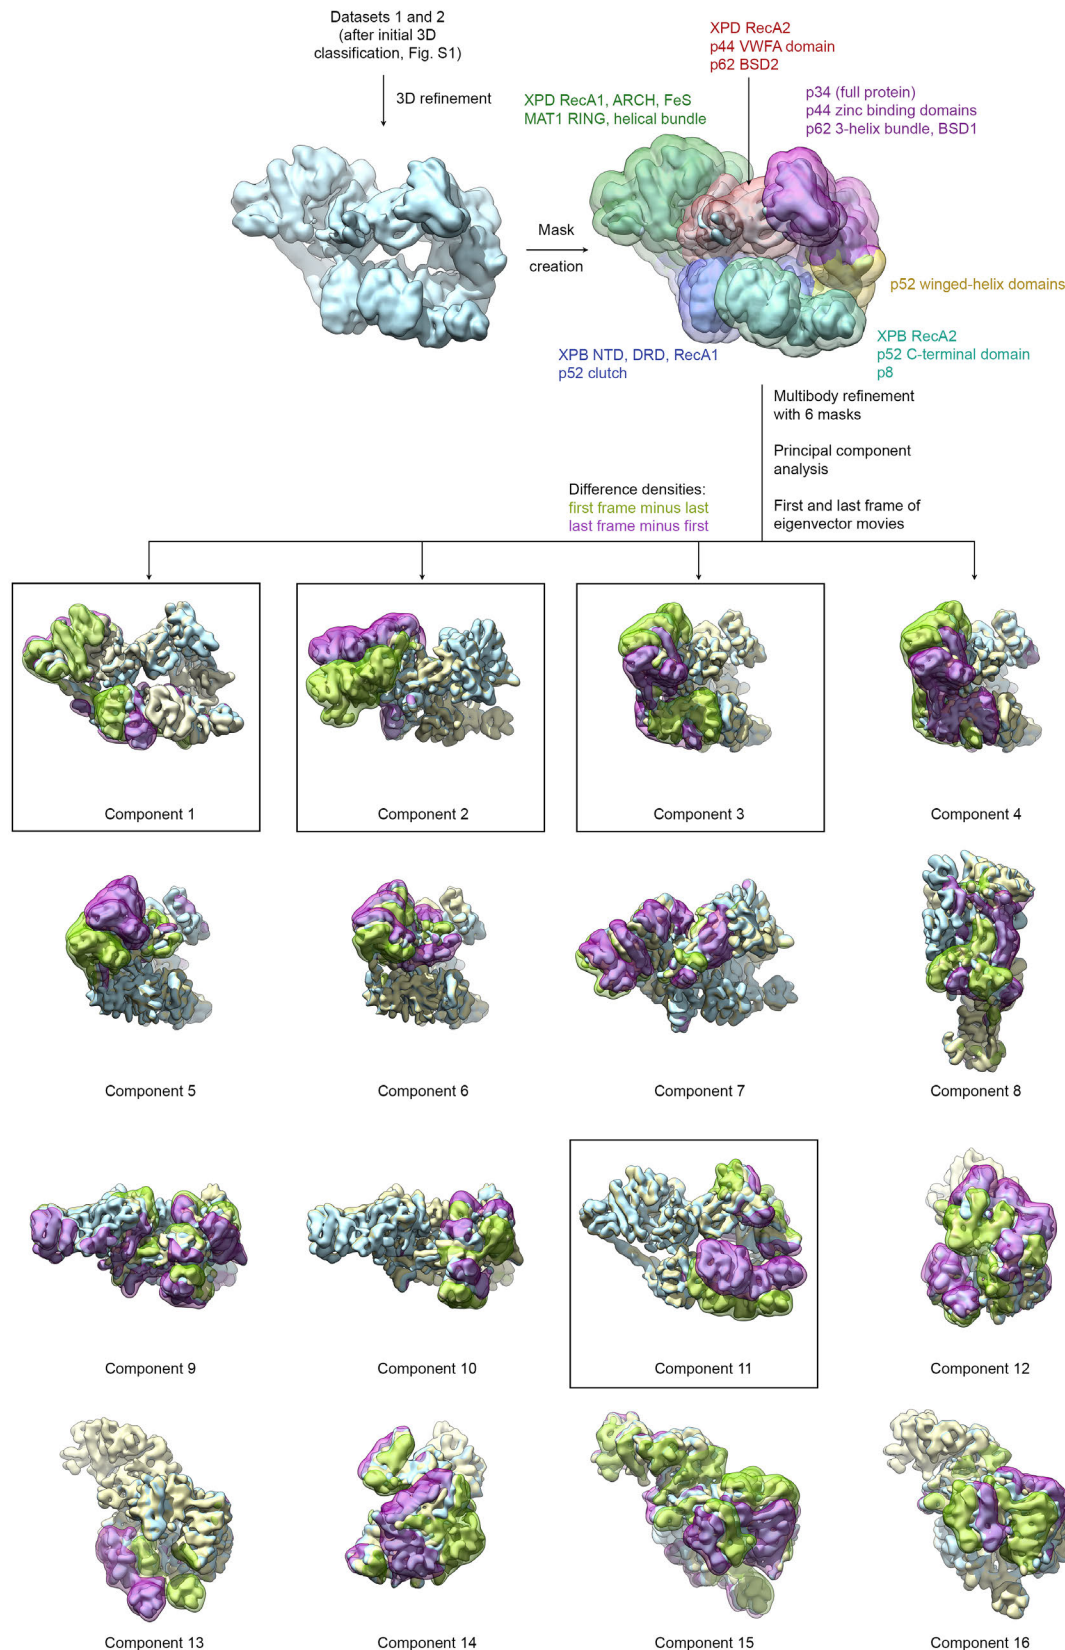

**Figure 4 – figure supplement 1. Analysis of conformational variance of TFIIF.** VPP datasets 1 and 2 were refined and subjected to multibody refinement using 6 masks followed by principal component analysis. The first and last

1427 frames of the resulting eigenvector movies of the first 16 principal components  
 1428 are shown (in light blue and light yellow), along with difference densities  
 1429 obtained by subtracting the last volume from the first (green) and vice versa  
 1430 (purple). For the boxed components, the particles with the highest and lowest  
 1431 eigenvalues were extracted and refined (see Figure 4A).  
 1432  
 1433

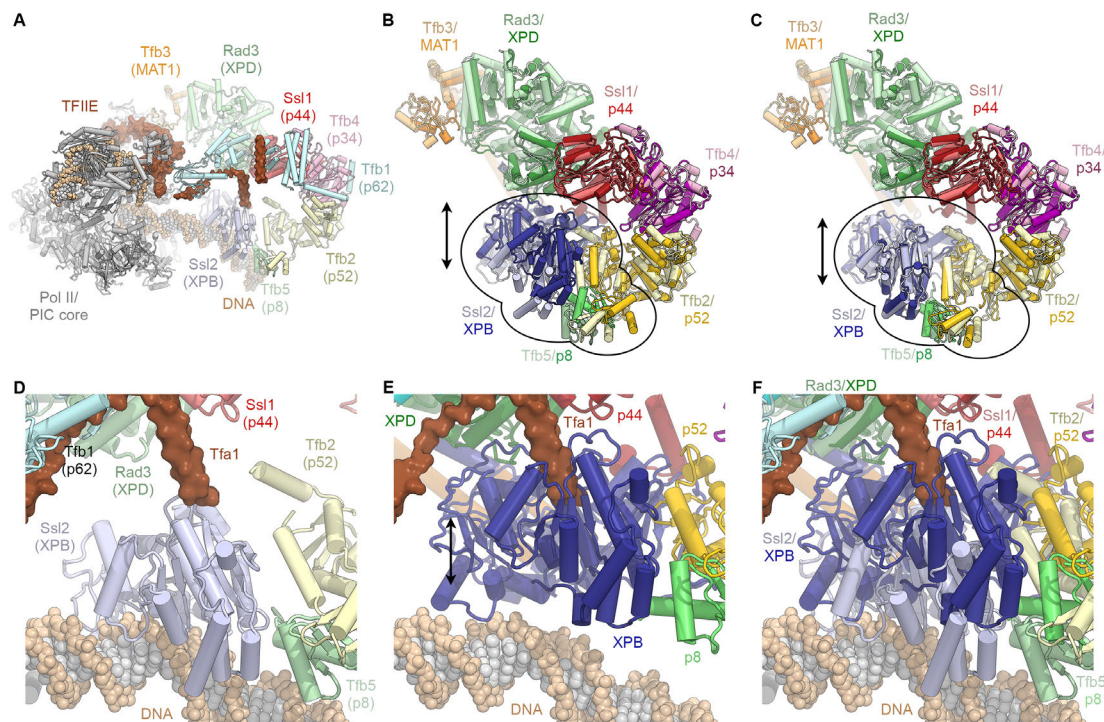

**Figure 4 – figure supplement 2. Conformational dynamics of TFIIF and comparison with the PIC-bound TFIIF.** (A) Rendering of the yeast TFIIF-containing Pol II-PIC (Schilbach et al., 2017). TFIIF subunits are colored and labeled with their yeast names, with human names in brackets. (B) Superposition of TFIIF from the yeast PIC (as shown in A, light colors) (Schilbach et al., 2017) and the complete structure of the human TFIIF core complex (this work; superposed on p44, bright colors) as single bodies. The top lobe of TFIIF (MAT1 helical bundle, XPB, p44, p34, p52 winged-helix domains; p62 not shown for clarity) aligns well, while the XPB-p52 (clutch/C-terminal domain)-p8 module is in a different position for the free and PIC-bound TFIIF (indicated). (C) Same as B, but with the human XPB-p52 (clutch/C-terminal domain)-p8 module superposed on the yeast structure as a rigid body. (D) View of DNA-bound Ssl2 (XPB) and neighboring subunits in the yeast Pol II-PIC (Schilbach et al., 2017). (E) View of human XPB, superposed on the yeast structure as in B. XPB could not bind DNA in this conformation, and the Tfa1 (TFIIE  $\alpha$ -subunit) bridge helix, as observed in the yeast Pol II-PIC, clashes with XPB. (F) Panels D and E combined, visualizing the conformational change of TFIIF upon entry into the Pol II-PIC.



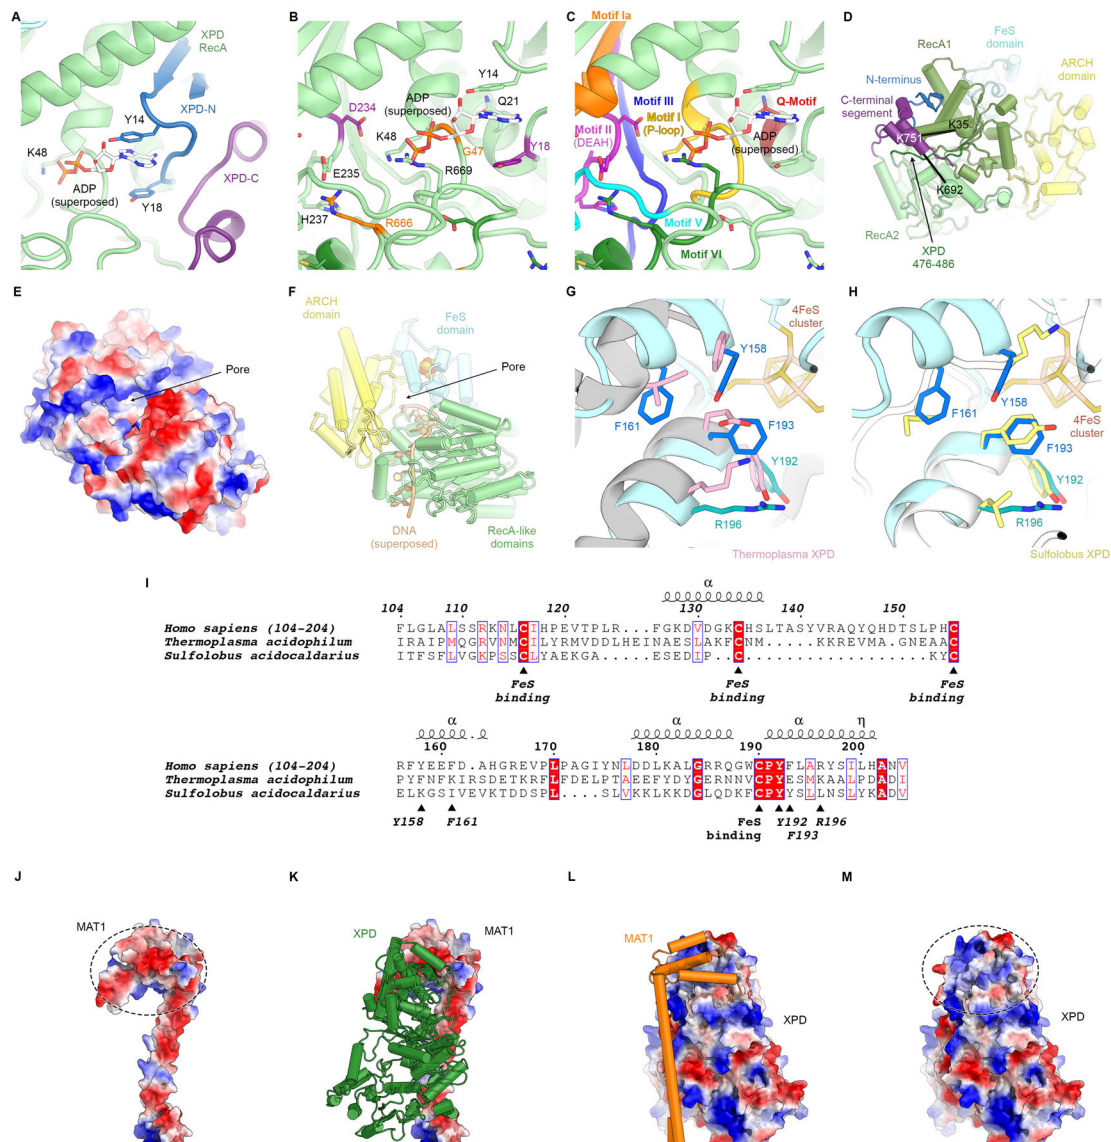

**Figure 5 – figure supplement 1. Structure of XPD.** (A) Close-up view of the XPD N- and C-terminal segments near the nucleotide binding pocket of the enzyme. Y12 and Y18 may stabilize nucleotides when bound (not present in our structure). (B) View of the nucleotide binding site of XPD with superposed ADP from nucleotide-bound DinG (PDB ID 6FWS (Cheng & Wigley, 2018)). Residues mutated in human disease are shown as sticks and colored (purple: XP, orange: XP/CS, dark green, TTD). These include Y18, which we propose could form a stacking interaction with the base of a bound nucleotide, as well as residues in conserved helicase motifs (see C). (C) Same view as B, but with conserved helicase motifs color-coded. Motifs Q, I, II, and IV are involved in nucleotide binding and hydrolysis. (D) View of the back side of XPD, with the N- and C-terminal segments indicated. The C-terminal segment interacts with the linker

between XPD RecA1 and RecA2 (residues 476-486). CX-MS crosslinks support the assignment of the C-terminal segment. The K751Q polymorphism has been associated with cancer therapy outcomes (Mlak et al., 2018; Peters et al., 2014), though functional differences between the variants has been debated (Clarkson & Wood, 2005). **(E, F)** Electrostatic surface (E) and cartoon (F) representations of the XPD structure, highlighting the pore between the XPD ARCH and FeS domains through which DNA (superposed from PDB ID 6FWR (Cheng & Wigley, 2018)) passes while being translocated by XPD. **(G, H)** Comparison of the structures of the human and archaeal FeS domains (**F**, *Thermoplasma*, PDB ID 4A15 (Kuper et al., 2012), **G**, *Sulfolobus*, PDB ID 3CRV (Fan et al., 2008)). There are differences at the secondary structure level, and functionally important residues are only partially conserved. **(I)** Sequence alignment of FeS domains from human, *Sulfolobus*, and *Thermoplasma* XPD. With the exception of the conserved cysteine residues that bind the FeS-cluster, sequence conservation in this domain is relatively low. Residues discussed in the text are indicated. **(J-M)** Charge complementary of regions of negative and positive electrostatic potential near the MAT1 3-helix bundle and the XPD ARCH domain interface (circled).



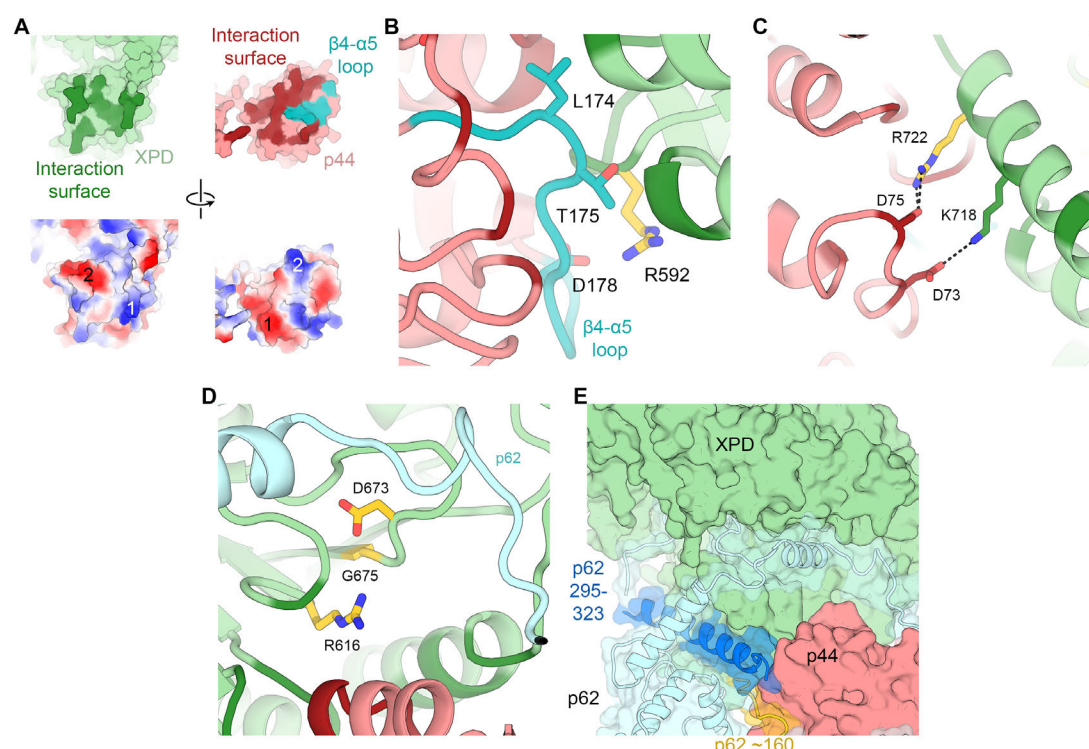

**Figure 5 – figure supplement 2. XPD-p44 interaction.** (A) Top: XPD-p44 (XPD green, p44 red) interaction surfaces are shown in darker shade (interacting residues in p44  $\beta$ 4- $\alpha$ 5 loop are shown in teal). Bottom: Charge complementarity of the interface (two major complementary regions numbered 1 and 2). (B) Detailed view of the  $\beta$ 4- $\alpha$ 5 loop (teal) with mutations discussed in the text. XPD-p44 interacting regions (defined as residues within  $< 4 \text{ \AA}$  of neighboring protein) are colored in dark green (XPD) and dark red (p44). Residues discussed in the text are shown as sticks; those with mutation data (natural variants or experimental constructs) are colored yellow on XPD, teal on p44. (C) Detailed view of the interactions formed by XPD R722, which is mutated in TTD. (D) View of XPD residues R616, D673, and G675 in the context of p62 and p44. (E) XPD-p44-p62 interaction region. p62 segments interacting with both XPD and p44 are colored dark blue and yellow.

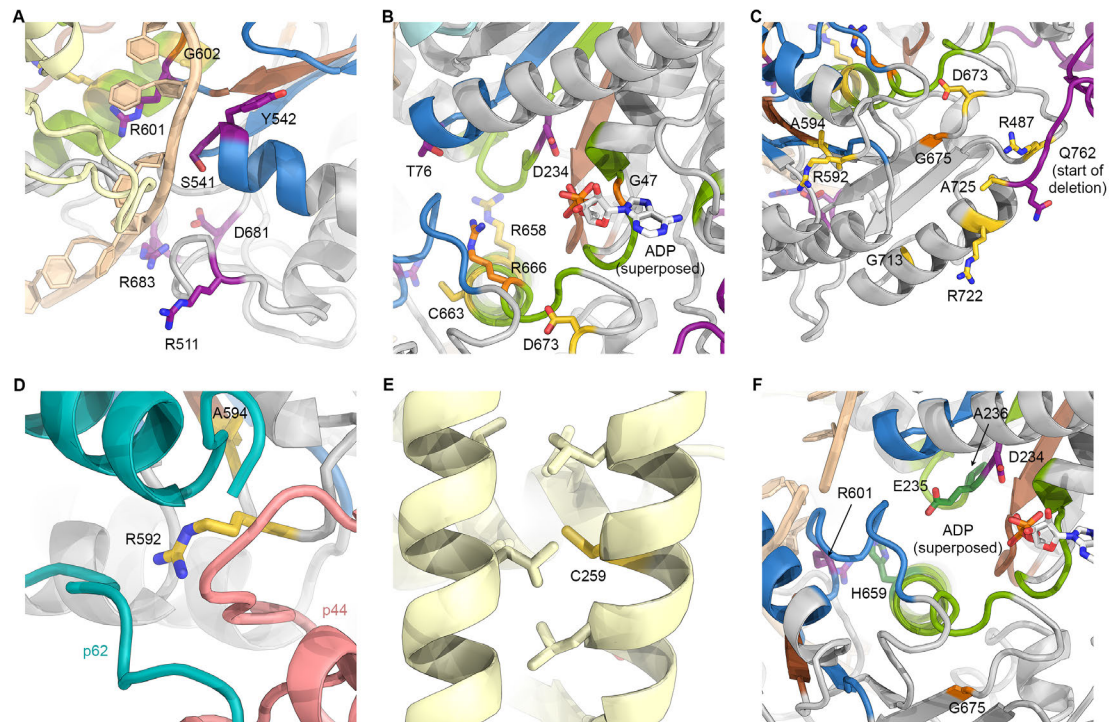

**Figure 6 – figure supplement 1. Mapping of XPD disease mutations on the TFIIH structure.** (A) Several residues affected by XP mutations localize near the DNA binding surfaces of XPD. This figure uses the same color scheme as Figure 6 (XP mutations purple; TTD yellow; CS-XP orange; helicase elements for DNA binding in blue, nucleotide binding and hydrolysis in green, coupling of nucleotide hydrolysis to DNA translocation in brown; DNA superposed from (Cheng & Wigley, 2018)). (B) Mapping of mutations near the catalytic site of XPD. ADP superposed from (Cheng & Wigley, 2018) (C) Mutations near the interface with p44. Note the predominance of TTD mutations in this peripheral region of XPD. Also see Figure 5E, Figure 5 – figure supplement 2, and text for details. (D) XPD R592, affected by a TTD mutation is in a key location where p44, p62, and XPD interact. (E) Location of C259, affected by the C259Y mutation, which likely causes disruption of ARCH domain integrity and leads to defects in CAK subcomplex recruitment. (F) Mapping of yeast Rad3 *rem* mutations (green) onto our XPD structure. E235 and A236 are part of the conserved DEAH sequence motif (helicase motif II), as is the immediately adjacent XP mutation D234. H659 localizes near DNA (according to the superposed model) and may be involved in ordering R601, which is in direct contact with the modeled DNA and affected by an XP mutation.

1523

1524

1525

1526

1527

1528

1529

## Supplementary Information

1530

1531

for

1532

1533

## The complete structure of the human TFIIH core complex

1534

1535

1536

1537

Basil J. Greber, Daniel B. Toso, Jie Fang, Eva Nogales\*

1538

1539

\* Correspondence should be addressed to E.N. (ENogales@lbl.gov).

1540

1541

1542

1543

1544

### This PDF files includes:

1545

Supplementary Tables 1-3

1546

Supplementary Notes 1-2

1547

1548

1549

1550

### Other Supplementary Information for this manuscript includes the following:

1551

Supplementary Data Table S1

1552

1553

**Supplementary Table 1. Data collection statistics.** All datasets were acquired on Gatan K2 Summit direct electron detectors mounted in 300 kV-electron microscopes with three-condenser type electron optics. Abbreviations: TEM, transmission electron microscope; VPP, volta phase plate;  $\Sigma$ , sum.

| Data set # | TEM         | VPP | Pixel size (Å) | Total dose (e <sup>-</sup> /Å <sup>2</sup> ) | Frames | K2 acquisition mode | Total movies | Movies retained | Particles after initial 3D sorting | Particles in final map | Data reported      |
|------------|-------------|-----|----------------|----------------------------------------------|--------|---------------------|--------------|-----------------|------------------------------------|------------------------|--------------------|
| 1          | Titan KRIOS | Yes | 1.15           | 50                                           | 33     | Super-resolution    | 3,270        | 2,047           | 154,298                            | 27,165                 | This study         |
| 2          | Titan KRIOS | Yes | 1.15           | 50                                           | 33     | Super-resolution    | 3,190        | 1,804           | 134,654                            | 23,034                 | This study         |
| 3          | Titan KRIOS | Yes | 1.15           | 50                                           | 33     | Super-resolution    | 4,804        | 3,269           | 191,830                            | 18,365                 | This study         |
| 4          | Titan KRIOS | Yes | 1.15           | 50                                           | 33     | Super-resolution    | 3,283        | 2,709           | 107,390                            | 32,008                 | This study         |
| 5          | Titan KRIOS | Yes | 1.15           | 50                                           | 33     | Super-resolution    | 4,958        | 2,857           | 85,582                             | 22,717                 | This study         |
| 6          | Titan KRIOS | Yes | 1.15           | 50                                           | 50     | Super-resolution    | 1,932        | 1,631           | 113,001                            | 15,370                 | This study         |
| 7          | Titan KRIOS | No  | 1.32           | 40                                           | 30     | Super-resolution    | 2,719        | 476             | 12,788                             | -                      | This study         |
| 8          | Titan       | No  | 1.32           | 40                                           | 30     | Counting            | 1,734        | 215             | 3,942                              | -                      | Greber et al. 2017 |
| 9          | Titan       | No  | 1.32           | 40                                           | 30     | Counting            | 2,694        | 262             | 4,617                              | -                      | Greber et al. 2017 |
| 10         | Titan       | No  | 1.32           | 40                                           | 30     | Counting            | 2,593        | 653             | 19,642                             | -                      | Greber et al. 2017 |
| $\Sigma$   |             |     |                |                                              |        |                     | 31,177       | 15,923          | 827,744                            | 138,659                |                    |

## Supplementary Table 2. Components of the TFIIH structure.

| Protein  | Chain ID | Size* (aa) | Modeled residues          | Sequence accession code | Alternative names | Comments                                                                                                                |
|----------|----------|------------|---------------------------|-------------------------|-------------------|-------------------------------------------------------------------------------------------------------------------------|
| XPB      | A        | 782        | 34-204, 247-730           | P19447                  | ERCC3             | -                                                                                                                       |
| XPB      | B        | 760        | 1-760                     | P18074                  | ERCC2             | 4Fe4S-cluster: SF4, residue 1000.                                                                                       |
| p62      | C        | 548        | 107-173, 183-323, 345-547 | P32780                  | GTF2H1            | BSD1 domain docked and refined with reference restraints; residues 233-295 built as poly-alanines and deposited as UNK. |
| p52      | D        | 462        | 7-458                     | Q92759                  | GTF2H4            |                                                                                                                         |
| p44      | E        | 395        | 15-267, 282-387           | Q13888                  | GTF2H2            | Zn <sup>2+</sup> , residues 401, 402, 403                                                                               |
| p34      | F        | 308        | 8-72, 95-292              | Q13889                  | GTF2H3            | Zn <sup>2+</sup> , residues 401                                                                                         |
| p8       | G        | 71         | 2-67                      | Q6ZYL4                  | GTF2H5, TTDA      | -                                                                                                                       |
| CDK7     | -        | 346        | -                         | P50613                  | MO15              | Not visualized.                                                                                                         |
| Cyclin H | -        | 323        | -                         | P51946                  | CCNH              | Not visualized.                                                                                                         |
| MAT1     | H        | 309        | 1-210                     | P51948                  | MNAT1             | N-terminal RING domain docked and refined with tight reference restraints.<br>Zn <sup>2+</sup> , residues 400, 401      |

\* According to Uniprot (<http://www.uniprot.org>).

† Unassigned sequences were initially modeled as poly-alanine and deposited as UNK.



### Supplementary Table 3. Data collection, map and model refinement, model validation.

| <b>Data collection</b>                                      | <b>Datasets 1-6</b>     |
|-------------------------------------------------------------|-------------------------|
| Microscope                                                  | Titan KRIOS             |
| Stage type                                                  | Autoloader              |
| Voltage (kV)                                                | 300                     |
| Detector                                                    | K2 Summit               |
| Energy filter                                               | GIF Quantum             |
| Other                                                       | Volta phase plate       |
| Pixel size (Å)                                              | 1.15                    |
| Defocus range (μm)                                          | 0.3-1.2                 |
| Electron dose (e <sup>-</sup> /Å <sup>2</sup> )             | 50                      |
| <b>Reconstruction</b>                                       | <b>EMD-XXXX</b>         |
| Software                                                    | RELION 3                |
| Particles                                                   | 138,659                 |
| Box size (pixels)                                           | 256 x 256 x 256         |
| Accuracy rotations (°)                                      | 1.4                     |
| Accuracy translations (pixels)                              | 0.8                     |
| Map resolution (Å)                                          | 3.7                     |
| Map sharpening b-factor (Å <sup>2</sup> )                   | -142                    |
| <b>Coordinate refinement</b>                                |                         |
| Software                                                    | PHENIX                  |
| Algorithm                                                   | REAL SPACE REFINE       |
| Box size (Å)                                                | 294.4 x 294.4 x 294.4   |
| Resolution cutoff (Å)                                       | 3.7                     |
| FSC <sub>model-vs-map</sub> =0.5 (Å)                        | 3.9                     |
| <b>Model</b>                                                | <b>PDB-XXXX</b>         |
| Number of residues                                          | 3203                    |
| Protein                                                     | 3196                    |
| Ligand (Fe <sub>4</sub> S <sub>4</sub> , Zn <sup>2+</sup> ) | 7                       |
| B-factors overall                                           | 74.5                    |
| Protein                                                     | 74.5                    |
| Ligand (Fe <sub>4</sub> S <sub>4</sub> )                    | 63.4                    |
| Ligand (Zn <sup>2+</sup> )                                  | 133.8                   |
| R.m.s. deviations                                           |                         |
| Bond lengths (Å)                                            | 0.009                   |
| Bond angles (°)                                             | 1.190                   |
| <b>Validation</b>                                           |                         |
| Molprobity score (percentile)                               | 2.0 (99 <sup>th</sup> ) |
| Molprobity clashscore (percentile)                          | 6.7 (97 <sup>th</sup> ) |
| Rotamer outliers (%)                                        | 0.3                     |
| C <sub>β</sub> deviations (%)                               | 0                       |
| Ramachandran plot                                           |                         |
| Favored (%)                                                 | 87.8                    |
| Allowed (%)                                                 | 11.9                    |
| Outliers (%)                                                | 0.3                     |

# Supplementary Discussion

**Supplementary Note 1: The XPD-p44 interface.** XPD serves a dual role within TFIIH: Its helicase activity is essential for TFIIH function in NER (Kuper et al., 2014; Winkler et al., 2000), and it serves as an architectural element in transcription, enabling the proper placement of the CAK subcomplex within the Pol II PIC (Abdulrahman et al., 2013; Drapkin et al., 1996; Dubaele et al., 2003; Greber et al., 2017; Guzder et al., 1994; He et al., 2016; Murakami et al., 2015; Robinson et al., 2016; Rossignol et al., 1997; Schilbach et al., 2017; Tirode et al., 1999; Tsai et al., 2017). The XPD-p44 interaction is critical both for the enzymatic and architectural roles of XPD (Coin et al., 1998; Dubaele et al., 2003; Kim et al., 2015; Kuper et al., 2014). Therefore, disruption of the XPD-p44 interface can simultaneously cause NER defects and impair transcription initiation, which leads to a TTD phenotype in human patients (Dubaele et al., 2003). Our structure provides a detailed view of this interaction interface, which encompasses the p44 loops  $\beta$ 1- $\alpha$ 1,  $\beta$ 4- $\alpha$ 5,  $\beta$ 5- $\alpha$ 6, and  $\beta$ 6- $\alpha$ 7 connecting  $\beta$ -strands and  $\alpha$ -helices in the p44 VWA domain (Figure 5E, Figure 5 – figure supplement 2). Mutations L174W, T175R, and D178A in the p44  $\beta$ 4- $\alpha$ 5 loop have been shown to abrogate the p44-XPD interaction and to reduce the helicase activity of XPD, implicating this region in XPD activation (Kim et al., 2015; Seroz et al., 2000). Our structure suggests that the insertion of large residues (L174W, T175R) into the tightly packed p44-XPD interface (Figure 5 – figure supplement 2B) is likely to lead to steric clashes, while the D178A mutation would break a likely salt bridge with XPD R592 (Figure 5C). Strikingly, the R592P mutation in XPD, the side chain of which packs against the p44  $\beta$ 4- $\alpha$ 5 loop in wild type XPD, causes TTD in human patients (Cleaver et al., 1999), underscoring the importance of this interaction.

In XPD, RecA2 loop residues 531-533, 563-565, 589-592, 612-616, and the helical segment 718-725 form the p44 interaction interface (Figure 5E). Using recombinant human and *Chaetomium thermophilum* proteins, it has been shown that the XPD R722W mutation impairs the interaction between p44 and XPD, thereby interfering with both the p44-dependent stimulation of the XPD ATPase

and helicase activities in NER, and architectural role of p44 in transcription initiation (Kuper et al., 2014). Our structure shows that the R722W mutation disrupts a salt bridge to p44 D75, and the bulky tryptophan side chain may additionally cause steric clashes with neighboring p44 residues, explaining the deleterious effect of the mutation (Figure 5E, Figure 5 – figure supplement 2C). It has been proposed that the R616P, D673G, and G675R disease mutations, which impair the p44-XPB interaction and the XPB helicase activity (Dubaele et al., 2003), exert their deleterious effect by impairing the interaction between XPB and p62 (Luo et al., 2015). However, our structure shows that G675 is buried in the enzymatic core (Figure 5 – figure supplement 2D), where accommodation of the large arginine side chain in G675R will disrupt the structure of the protein. XPB D673 is located in a  $\beta$ -strand in the vicinity of the XPB-p62 interface (Figure 5 – figure supplement 2D); however, no direct interactions of this residue with p62 are observed. XPB R616 is located at the p44-XPB interface, where its side chain is packed against neighboring residues and may engage in a salt bridge with p44 D204 (Figure 5 – figure supplement 2D). These interactions would be disrupted in the R616P mutant. Altogether, these observations suggest that these mutations act either via disruption of XPB structure or the XPB-p44 interface, not via p62. Nevertheless, a contribution of p62 to the stabilization of the p44-XPB interface cannot be excluded because several p62 elements are observed near the interface (Figure 5 – figure supplement 2E). As discussed in the main text, some of these interactions are dynamic (Figure 4 – figure supplement 2G-J) and unlikely to be strictly required for the stability of the p44-XPB interface.

**Supplementary Note 2: Mapping of XPB mutations.** In addition to our analysis of the XPB-p44 interface and the mutations located in its vicinity, we were also able to map numerous other human disease mutations onto our structure (Figure 6). Our results are in good agreement with the hypotheses derived from comparative modeling based on homologous bacterial DNA repair enzymes (Bienstock et al., 2003), archaeal XPB homologs (Fan et al., 2008; Liu et al., 2008; Wolski et al., 2008), and our previous lower-resolution TFIIH structure (Greber et al., 2017). Several XP mutations map in the regions that interact with bound DNA, as confirmed by superposing homologous DNA-bound helicase structures

(Figure 6 – figure supplement 1A), or in the conserved motifs near the ATPase active site (Figure 6 – figure supplement 1B). These mutations impair XPD helicase activity (Dubaele et al., 2003; Fan et al., 2008; Liu et al., 2008), causing the NER defects that manifest in the XP disease symptoms. As explained above (Supplementary Note 1), TTD mutations tend to map to the periphery of XPD, including the XPD-p44 interface (Supplementary Note 1, Figure 5E, Figure 5 – figure supplement 2, Figure 6 – figure supplement 1C, D), the ARCH domain (Figure 6 – figure supplement 1E), or the FeS domain (Figures 5B, 6). The C259Y mutation in the ARCH domain likely impairs the proper folding of this domain due to steric hindrance introduced by the large tyrosine side chain, which in turn impairs association of the CAK subcomplex through disruption of MAT1 association, as discussed previously (Greber et al., 2017; Liu et al., 2008; Wolski et al., 2008). Consistent with its observed location in our structure (Figure 5B), the R112H mutation in the FeS domain leads to destabilization of the 4FeS cluster (Rudolf et al., 2006), which in turn leads to the disruption of folding of this entire domain (Fan et al., 2008) and lower TFIIH levels overall (Botta et al., 2002). Another TTD mutation that does not localize to the periphery of XPD is the particularly interesting temperature-sensitive mutation R658C, for which patients show exacerbated symptoms, including complete hair loss, when they develop a fever (Vermeulen et al., 2001). This residue is located at the interface between the XPD RecA1 and RecA2 domains, where it forms a salt bridge across the domain interface (Figure 6B). This interface would be partially destabilized by the mutation at normal temperature and more severely disrupted at elevated temperature, leading to stronger disease symptoms.

We also mapped onto our structure the location of the so-called *rem* mutations in Rad3, the yeast homolog of XPD. These mutations increase the affinity of Rad3 for DNA, which leads to retention of Rad3/XPD on DNA lesions, incomplete NER reactions, and subsequent DNA breakage upon arrival of a DNA replication fork (Herrera-Moyano et al., 2014; Moriel-Carretero & Aguilera, 2010). We mapped the *rem* mutations Rad3-E236G (XPD E235), Rad3-A237T (XPD A236), and Rad3-H661Y (XPD-H659Y), as well as the human XP-CS mutation XPD-G675R, which also exhibits elevated DNA affinity but reduced helicase activity in an

archaeal model system (Fan et al., 2008) and DNA breakage in patient cells (Theron et al., 2005), onto our structure (Figure 6 – figure supplement 1F). XPD E235 and A236 are part of the conserved helicase motif II (signature sequence DEAH, Figure 5 – figure supplement 1C, Figure 6 – figure supplement 1F) (Fairman-Williams et al., 2010), and as such critical for nucleotide hydrolysis. Notably, the neighboring XPD D234, also part of motif II (Figure 5 – figure supplement 1C, Figure 6 – figure supplement 1C, F), is a human XP mutation (Cleaver et al., 1999). XPD H659 is located nearby, and contacts R601, which locates to the immediate vicinity of the DNA based on superposition with structures of DNA-bound helicases (Büttner et al., 2007; Cheng & Wigley, 2018) (Figure 6 – figure supplement 1F) and is affected by an XP mutation (Cleaver et al., 1999). In agreement with previous proposals, the *rem* mutations are therefore localized near regions responsible for ATP hydrolysis and DNA binding, consistent with the idea that they lead to stalling of NER complexes at DNA lesions, which may ultimately lead to incomplete NER, DNA breaks, failure to re-start transcription, and the XP-CS phenotype (Moriel-Carretero et al., 2015).

In summary, our structure pinpoints the locations of XPD mutations that provide insight into human disease mechanisms, and in most cases resolves the density for the side chains of the affected residues, thereby providing a structural framework for the detailed analysis of the interactions of the affected residues and the effects of these mutations.



## Analysis of CX-MS data for human TFIIF

Chemical crosslinking-mass spectrometry data taken from Luo et al., Mol. Cell 59 (5): 794-806 (2015) and mapped onto the cryo-EM structure of human TFIIF.

Residues not built in the cryo-EM structure of human TFIIF are printed **red**.  
Crosslinking distances refer to C $\alpha$ -C $\alpha$  distance of crosslinked lysine residues.  
The expected maximum crosslink distance for BS3-induced crosslinks is 30 Å.

Color coding for crosslinking distances: **Agreement** ( $< 30$  Å) **Borderline** (30-35 Å) **Incompatible** ( $> 35$  Å)

### Intramolecular crosslinks in human TFIIF subunits

| Protein  | Residue 1 | Residue 2 | Distance (Å) | Comments                               |
|----------|-----------|-----------|--------------|----------------------------------------|
| p34      | 100       | 56        | 18.0         |                                        |
| p34      | 149       | 56        | 14.0         |                                        |
| p34      | 97        | 56        | 23.2         |                                        |
| p34      | 74        | 56        | -            |                                        |
| p34      | 152       | 56        | 14.6         |                                        |
| p34      | 125       | 56        | 35.2         |                                        |
| p34      | 125       | 74        | -            |                                        |
| MAT1     | 127       | 137       | 16.8         |                                        |
| MAT1     | 167       | 180       | 19.6         |                                        |
| MAT1     | 176       | 202       | 11.9         |                                        |
| MAT1     | 55        | 70        | 16.0         |                                        |
| MAT1     | 137       | 55        | 27.3         |                                        |
| MAT1     | 70        | 76        | 10.0         |                                        |
| MAT1     | 70        | 77        | 10.7         |                                        |
| XPD      | 268       | 274       | 9.7          |                                        |
| XPD      | 128       | 603       | 20.5         |                                        |
| XPD      | 692       | 751       | 28.6         |                                        |
| XPD      | 223       | 228       | 9.3          |                                        |
| XPD      | 223       | 69        | 13.0         |                                        |
| XPD      | 223       | 445       | 14.0         |                                        |
| XPD      | 223       | 35        | 16.8         |                                        |
| XPD      | 133       | 181       | 18.4         |                                        |
| XPD      | 35        | 751       | 26.8         |                                        |
| XPD      | 603       | 82        | 17.5         |                                        |
| XPD      | 228       | 35        | 10.4         |                                        |
| XPD      | 682       | 689       | 10.1         |                                        |
| XPD      | 113       | 603       | 18.6         |                                        |
| XPD      | 113       | 128       | 9.3          |                                        |
| XPD      | 113       | 181       | 11.3         |                                        |
| XPD      | 507       | 634       | 19.5         |                                        |
| XPD      | 507       | 682       | 9.8          |                                        |
| CDK7     | 32        | 342       | -            | CDK7 is not modeled in our structure.  |
| CDK7     | 44        | 52        | -            |                                        |
| CDK7     | 328       | 42        | -            |                                        |
| CDK7     | 14        | 42        | -            |                                        |
| CDK7     | 14        | 32        | -            |                                        |
| CDK7     | 14        | 44        | -            |                                        |
| CDK7     | 330       | 343       | -            |                                        |
| XPB      | 167       | 222       | -            | Crosslink of the DRD loop insertion    |
| XPB      | 167       | 326       | 16.3         |                                        |
| XPB      | 569       | 715       | 12.4         |                                        |
| XPB      | 171       | 311       | 29.2         |                                        |
| XPB      | 171       | 217       | -            | Crosslinks of the DRD loop insertion   |
| XPB      | 171       | 222       | -            | that is not visible in the cryo-EM map |
| XPB      | 44        | 778       | -            |                                        |
| XPB      | 44        | 68        | 28.1         |                                        |
| XPB      | 322       | 326       | 6.2          |                                        |
| XPB      | 157       | 44        | 13.1         |                                        |
| XPB      | 549       | 577       | 12.0         |                                        |
| XPB      | 282       | 463       | 18.0         |                                        |
| XPB      | 282       | 476       | 21.5         |                                        |
| XPB      | 577       | 601       | 11.3         |                                        |
| XPB      | 142       | 222       | -            | Crosslinks of the DRD loop insertion   |
| XPB      | 142       | 241       | -            | that is not visible in the cryo-EM map |
| XPB      | 142       | 68        | 12.1         |                                        |
| XPB      | 311       | 379       | 10.0         |                                        |
| XPB      | 311       | 326       | 23.2         |                                        |
| XPB      | 217       | 326       | -            | Crosslinks of the DRD loop insertion   |
| XPB      | 222       | 326       | -            | that is not visible in the cryo-EM map |
| XPB      | 222       | 257       | -            |                                        |
| p62      | 129       | 504       | 15.3         |                                        |
| p62      | 18        | 38        | -            | Crosslinks of the N-terminal PH-       |
| p62      | 104       | 106       | -            | domain of p62 and other N-terminal     |
| p62      | 19        | 38        | -            | segments, which are not modeled        |
| p62      | 161       | 38        | -            | in our structure.                      |
| p62      | 102       | 106       | -            |                                        |
| p62      | 102       | 109       | -            |                                        |
| Cyclin H | 253       | 260       | -            | Cyclin H is not modeled in our         |
| Cyclin H | 274       | 62        | -            | structure.                             |
| Cyclin H | 293       | 295       | -            |                                        |
| Cyclin H | 189       | 72        | -            |                                        |
| Cyclin H | 62        | 72        | -            |                                        |
| Cyclin H | 292       | 295       | -            |                                        |
| p44      | 116       | 126       | 13.3         |                                        |
| p44      | 116       | 306       | 20.1         |                                        |
| p44      | 116       | 157       | 15.6         |                                        |
| p44      | 23        | 40        | 18.2         |                                        |
| p44      | 126       | 23        | 55.5         |                                        |
| p44      | 126       | 306       | 16.9         |                                        |
| p44      | 126       | 133       | 10.4         |                                        |
| p44      | 126       | 268       | 28.6         |                                        |
| p44      | 126       | 297       | 20.4         |                                        |
| p52      | 76        | 81        | 10.1         |                                        |
| p52      | 452       | 459       | -            |                                        |
| p52      | 452       | 456       | 6.7          |                                        |
| p52      | 378       | 53        | 31.8         |                                        |
| p52      | 127       | 53        | 24.6         |                                        |
| p8       | 2         | 31        | 24.5         |                                        |
| p8       | 6         | 31        | 17.0         |                                        |

### Intermolecular crosslinks in human TFIIF subunits

| Protein 1 | Residue 1 | Protein 2 | Residue 2 | Distance (Å) | Comments                                  |
|-----------|-----------|-----------|-----------|--------------|-------------------------------------------|
| p34       | 149       | p52       | 378       | 15.3         |                                           |
| p34       | 152       | p52       | 378       | 10.2         |                                           |
| p34       | 97        | p52       | 127       | 8.7          |                                           |
| XPB       | 379       | XPD       | 682       | 29.7         |                                           |
| XPB       | 222       | XPD       | 682       | -            |                                           |
| XPB       | 326       | XPD       | 682       | 18.4         |                                           |
| XPB       | 171       | XPD       | 682       | 19.6         |                                           |
| XPB       | 171       | XPD       | 507       | 19.1         |                                           |
| p62       | 378       | p34       | 125       | 25.7         |                                           |
| p62       | 38        | p34       | 125       | -            |                                           |
| p62       | 38        | XPB       | 549       | -            |                                           |
| p62       | 353       | p44       | 126       | 50.0         | p62-p44 crosslinks were discarded         |
| p62       | 38        | p44       | 126       | -            | in modeling due to high incidence         |
| p62       | 252       | p44       | 31        | 73.1         | of distance violations and excellent      |
| p62       | 161       | p44       | 116       | 22.3         | agreement of p62 model with               |
| p62       | 161       | p44       | 126       | 34.0         | p62-XPD crosslinks.                       |
| p62       | 350       | XPD       | 82        | 10.2         |                                           |
| p62       | 350       | XPD       | 113       | 17.0         |                                           |
| p62       | 365       | XPD       | 96        | 16.9         |                                           |
| p62       | 353       | XPD       | 603       | 19.6         |                                           |
| p62       | 353       | XPD       | 113       | 20.8         |                                           |
| p62       | 353       | XPD       | 82        | 9.4          |                                           |
| p62       | 275       | XPD       | 603       | 13.6         |                                           |
| p62       | 293       | XPD       | 603       | 23.0         |                                           |
| p62       | 293       | XPD       | 113       | 32.1         |                                           |
| p62       | 296       | XPD       | 603       | 25.7         |                                           |
| Cyclin H  | 239       | MAT1      | 55        | -            | Cyclin H is not modeled.                  |
| MAT1      | 121       | XPB       | 44        | 116.7        |                                           |
| MAT1      | 180       | XPB       | 171       | 17.7         |                                           |
| MAT1      | 202       | XPB       | 142       | 37.5         |                                           |
| MAT1      | 176       | XPB       | 171       | 19.3         |                                           |
| MAT1      | 167       | XPB       | 217       | -            | Crosslinks of the DRD loop insertion      |
| MAT1      | 167       | XPB       | 222       | -            | that is not visible in the cryo-EM map    |
| MAT1      | 167       | XPB       | 257       | 19.1         |                                           |
| MAT1      | 167       | XPD       | 689       | 26.9         |                                           |
| MAT1      | 167       | XPD       | 634       | 19.7         |                                           |
| p44       | 40        | p34       | 149       | 21.0         |                                           |
| p44       | 126       | p34       | 149       | 34.1         |                                           |
| p44       | 42        | p34       | 149       | 22.2         |                                           |
| p44       | 229       | p34       | 149       | 23.0         |                                           |
| p44       | 229       | p34       | 152       | 26.7         |                                           |
| p44       | 23        | XPB       | 142       | 7.7          |                                           |
| p44       | 31        | XPB       | 142       | 8.7          |                                           |
| p44       | 23        | p52       | 378       | 32.7         |                                           |
| p44       | 40        | p52       | 378       | 23.2         |                                           |
| p44       | 268       | p52       | 77        | 30.0         |                                           |
| p44       | 77        | p52       | 378       | 20.8         |                                           |
| p52       | 438       | XPB       | 526       | 33.9         |                                           |
| p52       | 438       | XPB       | 706       | 20.4         |                                           |
| p52       | 378       | XPB       | 526       | 51.6         |                                           |
| p52       | 378       | XPB       | 241       | -            |                                           |
| p52       | 378       | XPB       | 257       | 63.0         |                                           |
| p52       | 140       | XPD       | 29        | 92.4         | Likely false positives given the reliable |
| p52       | 277       | XPD       | 101       | 116.0        | assignment of p52 and XPD.                |
| p52       | 53        | p8        | 31        | 59.3         |                                           |
| p52       | 452       | p8        | 2         | 9.8          |                                           |
| p52       | 452       | p8        | 6         | 12.5         |                                           |
| p52       | 77        | p8        | 71        | -            |                                           |
| p52       | 456       | p8        | 2         | 11.8         |                                           |
| p52       | 456       | p8        | 6         | 18.5         |                                           |
| CDK7      | 52        | Cyclin H  | 293       | -            | CDK7 and Cyclin H are not modeled         |
| CDK7      | 293       | XPD       | 634       | -            | CDK7 is not modeled.                      |
| p8        | 71        | XPB       | 767       | -            | Crosslinks of p8 with the XPB RecA2       |
| p8        | 71        | XPB       | 526       | -            | domain are compatible with the            |
| p8        | 71        | XPB       | 59        | -            | architecture of TFIIF overall.            |
| p8        | 71        | XPB       | 476       | -            |                                           |
| p8        | 6         | XPB       | 167       | 88.0         |                                           |
